# Supplementary material for: Undiscovered Bat Hosts of Filoviruses
Source: PubMed Central journal article supplement (PMC4945033; doi:10.1371/journal.pntd.0004815), 2016-07-14
Supplement: pntd.0004815.s002.pdf [file pntd.0004815.s002.pdf]

| virus  | bat_species               | Pteropod fruit bat | Ab+ | Ab tested | PCR+ | PCR tested | primer    | min_individuals_tested | isolated+ | iso attempted indiv | Reference             | Notes                                                                                                                                                                                                                                                         |
|--------|---------------------------|--------------------|-----|-----------|------|------------|-----------|------------------------|-----------|---------------------|-----------------------|---------------------------------------------------------------------------------------------------------------------------------------------------------------------------------------------------------------------------------------------------------------|
| MARV   | Rousettus_ateles          | 1                  | 250 | 1622      | 40   | 1622       | MARV-VP35 | 1622                   | 7         | 1622                | Ammann et al. 2012    |                                                                                                                                                                                                                                                               |
| ZEBOV  | Chaerephon_major          | 0                  | 0   | 26        | NA   | NA         | NA        | 26                     | 0         | 26                  | Brennan et al. 1999   |                                                                                                                                                                                                                                                               |
| ZEBOV  | Eidolon_heckum            | 1                  | 0   | 6         | NA   | NA         | NA        | 6                      | 0         | 6                   | Brennan et al. 1999   |                                                                                                                                                                                                                                                               |
| ZEBOV  | Epomops_franqueti         | 1                  | 0   | 21        | NA   | NA         | NA        | 21                     | 0         | 21                  | Brennan et al. 1999   |                                                                                                                                                                                                                                                               |
| ZEBOV  | Hipposideros_cyclops      | 0                  | 0   | 52        | NA   | NA         | NA        | 52                     | 0         | 52                  | Brennan et al. 1999   |                                                                                                                                                                                                                                                               |
| ZEBOV  | Hipposideros_ruber        | 0                  | 0   | 17        | NA   | NA         | NA        | 17                     | 0         | 17                  | Brennan et al. 1999   |                                                                                                                                                                                                                                                               |
| ZEBOV  | Mops_condylurus           | 0                  | 0   | 54        | NA   | NA         | NA        | 54                     | 0         | 54                  | Brennan et al. 1999   |                                                                                                                                                                                                                                                               |
| ZEBOV  | Mops_congius              | 0                  | 0   | 20        | NA   | NA         | NA        | 20                     | 0         | 20                  | Brennan et al. 1999   |                                                                                                                                                                                                                                                               |
| ZEBOV  | Mops_nanus                | 0                  | 0   | 15        | NA   | NA         | NA        | 15                     | 0         | 15                  | Brennan et al. 1999   |                                                                                                                                                                                                                                                               |
| ZEBOV  | Mops_thersites            | 0                  | 0   | 69        | NA   | NA         | NA        | 69                     | 0         | 69                  | Brennan et al. 1999   |                                                                                                                                                                                                                                                               |
| ZEBOV  | Myotis_bocaggi            | 0                  | 0   | 17        | NA   | NA         | NA        | 17                     | 0         | 17                  | Brennan et al. 1999   |                                                                                                                                                                                                                                                               |
| ZEBOV  | Neoromicia_nanus          | 0                  | 0   | 73        | NA   | NA         | NA        | 73                     | 0         | 73                  | Brennan et al. 1999   |                                                                                                                                                                                                                                                               |
| ZEBOV  | Saccolaimus_peli          | 0                  | 0   | 9         | NA   | NA         | NA        | 9                      | 0         | 9                   | Brennan et al. 1999   |                                                                                                                                                                                                                                                               |
| ZEBOV  | Eidolon_heckum            | 1                  | 1   | 262       | NA   | NA         | NA        | 262                    | NA        | NA                  | Hayman et al. 2010    |                                                                                                                                                                                                                                                               |
| MARV   | Eidolon_heckum            | 1                  | 0   | 262       | NA   | NA         | NA        | 262                    | NA        | NA                  | Hayman et al. 2010    |                                                                                                                                                                                                                                                               |
| ZEBOV  | Hypsingathus_monstrosus   | 1                  | 0   | 3         | NA   | NA         | NA        | 3                      | NA        | NA                  | Hayman et al. 2010    |                                                                                                                                                                                                                                                               |
| MARV   | Hypsingathus_monstrosus   | 1                  | 0   | 3         | NA   | NA         | NA        | 3                      | NA        | NA                  | Hayman et al. 2010    |                                                                                                                                                                                                                                                               |
| ZEBOV  | Epomophorus_gambianus     | 1                  | 6   | 37        | NA   | NA         | NA        | 37                     | NA        | NA                  | Hayman et al. 2012a   |                                                                                                                                                                                                                                                               |
| RETV   | Epomophorus_gambianus     | 1                  | 3   | 37        | NA   | NA         | NA        | 37                     | NA        | NA                  | Hayman et al. 2012a   | Number that reacted to 1:1 RESTV-ZEBOV screen but not to singly                                                                                                                                                                                               |
| screen | Epomophorus_gambianus     | 1                  | 7   | 37        | NA   | NA         | NA        | 37                     | NA        | NA                  | Hayman et al. 2012a   |                                                                                                                                                                                                                                                               |
| ZEBOV  | Epomops_buettikoferi      | 1                  | 0   | 1         | NA   | NA         | NA        | 1                      | NA        | NA                  | Hayman et al. 2012a   |                                                                                                                                                                                                                                                               |
| RETV   | Epomops_buettikoferi      | 1                  | 0   | 1         | NA   | NA         | NA        | 1                      | NA        | NA                  | Hayman et al. 2012a   |                                                                                                                                                                                                                                                               |
| screen | Epomops_buettikoferi      | 1                  | 0   | 1         | NA   | NA         | NA        | 1                      | NA        | NA                  | Hayman et al. 2012a   | Number that reacted to 1:1 RESTV-ZEBOV screen but not to singly                                                                                                                                                                                               |
| RETV   | Epomops_franqueti         | 1                  | 3   | 27        | NA   | NA         | NA        | 27                     | NA        | NA                  | Hayman et al. 2012a   |                                                                                                                                                                                                                                                               |
| RETV   | Epomops_franqueti         | 1                  | 0   | 27        | NA   | NA         | NA        | 27                     | NA        | NA                  | Hayman et al. 2012a   |                                                                                                                                                                                                                                                               |
| screen | Epomops_franqueti         | 1                  | 7   | 27        | NA   | NA         | NA        | 27                     | NA        | NA                  | Hayman et al. 2012a   | Number that reacted to 1:1 RESTV-ZEBOV screen but not to singly                                                                                                                                                                                               |
| ZEBOV  | Hypsingathus_monstrosus   | 1                  | 2   | 16        | NA   | NA         | NA        | 16                     | NA        | NA                  | Hayman et al. 2012a   |                                                                                                                                                                                                                                                               |
| RETV   | Hypsingathus_monstrosus   | 1                  | 1   | 16        | NA   | NA         | NA        | 16                     | NA        | NA                  | Hayman et al. 2012a   |                                                                                                                                                                                                                                                               |
| screen | Hypsingathus_monstrosus   | 1                  | 4   | 16        | NA   | NA         | NA        | 16                     | NA        | NA                  | Hayman et al. 2012a   | Number that reacted to 1:1 RESTV-ZEBOV screen but not to singly                                                                                                                                                                                               |
| ZEBOV  | Nanonycteris_vedikampii   | 1                  | 0   | 4         | NA   | NA         | NA        | 4                      | NA        | NA                  | Hayman et al. 2012a   |                                                                                                                                                                                                                                                               |
| RETV   | Nanonycteris_vedikampii   | 1                  | 0   | 4         | NA   | NA         | NA        | 4                      | NA        | NA                  | Hayman et al. 2012a   |                                                                                                                                                                                                                                                               |
| screen | Nanonycteris_vedikampii   | 1                  | 1   | 4         | NA   | NA         | NA        | 4                      | NA        | NA                  | Hayman et al. 2012a   | Number that reacted to 1:1 RESTV-ZEBOV screen but not to singly                                                                                                                                                                                               |
| ZEBOV  | Hypsingathus_monstrosus   | 1                  | 0   | 1         | NA   | NA         | NA        | 1                      | 0         | 1                   | Germain 1978          | Bats may not have been Ab tested- isolation explicitly mentioned, Ab testing suggested by context.                                                                                                                                                            |
| ZEBOV  | Casinycteris_argynis      | 1                  | 0   | 1         | NA   | NA         | NA        | 2                      | 0         | 2                   | Leirs et al. 1999     |                                                                                                                                                                                                                                                               |
| ZEBOV  | Chaerephon_amosi          | 0                  | NA  | 120       | NA   | NA         | NA        | 121                    | 0         | 121                 | Leirs et al. 1999     |                                                                                                                                                                                                                                                               |
| ZEBOV  | Chaerephon_gumilus        | 0                  | 0   | 210       | NA   | NA         | NA        | 211                    | 0         | 211                 | Leirs et al. 1999     |                                                                                                                                                                                                                                                               |
| ZEBOV  | Epomops_franqueti         | 1                  | 0   | 2         | NA   | NA         | NA        | 2                      | 0         | 2                   | Leirs et al. 1999     |                                                                                                                                                                                                                                                               |
| ZEBOV  | Megaloglossus_woermanni   | 1                  | 0   | 38        | NA   | NA         | NA        | 43                     | 0         | 43                  | Leirs et al. 1999     |                                                                                                                                                                                                                                                               |
| ZEBOV  | Micropteropus_pusillus    | 1                  | 0   | 78        | NA   | NA         | NA        | 78                     | 0         | 78                  | Leirs et al. 1999     |                                                                                                                                                                                                                                                               |
| ZEBOV  | Miniopterus_minor         | 0                  | 0   | 2         | NA   | NA         | NA        | 2                      | 0         | 2                   | Leirs et al. 1999     |                                                                                                                                                                                                                                                               |
| ZEBOV  | Mops_condylurus           | 0                  | 0   | 10        | NA   | NA         | NA        | 10                     | 0         | 10                  | Leirs et al. 1999     |                                                                                                                                                                                                                                                               |
| ZEBOV  | Mops_nanus                | 0                  | 0   | 14        | NA   | NA         | NA        | 14                     | 0         | 14                  | Leirs et al. 1999     |                                                                                                                                                                                                                                                               |
| ZEBOV  | Mops_niveiventer          | 0                  | 0   | 3         | NA   | NA         | NA        | 3                      | 0         | 3                   | Leirs et al. 1999     |                                                                                                                                                                                                                                                               |
| ZEBOV  | Mops_thersites            | 0                  | 0   | 1         | NA   | NA         | NA        | 1                      | 0         | 1                   | Leirs et al. 1999     |                                                                                                                                                                                                                                                               |
| ZEBOV  | Myotis_ahillii            | 0                  | 0   | 1         | NA   | NA         | NA        | 2                      | 0         | 2                   | Leirs et al. 1999     |                                                                                                                                                                                                                                                               |
| ZEBOV  | Myotis_bocaggi            | 0                  | 0   | 22        | NA   | NA         | NA        | 22                     | 0         | 22                  | Leirs et al. 1999     |                                                                                                                                                                                                                                                               |
| ZEBOV  | Neoromicia_madagasyensis  | 0                  | 0   | 0         | NA   | NA         | NA        | 1                      | 0         | 1                   | Leirs et al. 1999     | No individuals Ab tested (1 isolation attempt)                                                                                                                                                                                                                |
| ZEBOV  | Neoromicia_nanus          | 0                  | 0   | 2         | NA   | NA         | NA        | 2                      | 0         | 2                   | Leirs et al. 1999     |                                                                                                                                                                                                                                                               |
| ZEBOV  | Neoromicia_tenuispinis    | 0                  | 0   | 1         | NA   | NA         | NA        | 1                      | 0         | 1                   | Leirs et al. 1999     |                                                                                                                                                                                                                                                               |
| ZEBOV  | Nycteris_hispida          | 0                  | 0   | 1         | NA   | NA         | NA        | 2                      | 0         | 2                   | Leirs et al. 1999     |                                                                                                                                                                                                                                                               |
| ZEBOV  | Scotophilus_dinganii      | 0                  | 0   | 19        | NA   | NA         | NA        | 20                     | 0         | 20                  | Leirs et al. 1999     |                                                                                                                                                                                                                                                               |
| ZEBOV  | Epomops_franqueti         | 1                  | 5   | 117       | 5    | 117        | FILO-L    | 117                    | 5         | 117                 | see note              | Isolation attempted, all negative, but listed by location not species. Some animals tested for Ab and not PCR and vice-versa. No overlap in PCR/Ab positives, so number of bats positive is Ab+ plus PCR. Several filo primers used in addition to universal. |
| ZEBOV  | Hypsingathus_monstrosus   | 1                  | 4   | 17        | 4    | 21         | FILO-L    | 21                     | 4         | 21                  | see note              | Isolation attempted, all negative, but listed by location not species. Some animals tested for Ab and not PCR and vice-versa. No overlap in PCR/Ab positives, so number of bats positive is Ab+ plus PCR. Several filo primers used in addition to universal. |
| ZEBOV  | Myonycteris_torquata      | 1                  | 4   | 58        | 4    | 141        | FILO-L    | 141                    | 4         | 141                 | see note              | Isolation attempted, all negative, but listed by location not species. Some animals tested for Ab and not PCR and vice-versa. No overlap in PCR/Ab positives, so number of bats positive is Ab+ plus PCR. Several filo primers used in addition to universal. |
| ZEBOV  | Macroglossus_sobrinus     | 1                  | 0   | 1         | 0    | 1          | FILO-L    | 1                      | NA        | NA                  | Olival et al. 2013    |                                                                                                                                                                                                                                                               |
| RETV   | Macroglossus_sobrinus     | 1                  | 0   | 1         | 0    | 1          | FILO-L    | 1                      | NA        | NA                  | Olival et al. 2013    |                                                                                                                                                                                                                                                               |
| screen | Macroglossus_sobrinus     | 1                  | 0   | 1         | 0    | 1          | FILO-L    | 1                      | NA        | NA                  | Olival et al. 2013    | Number that reacted to 1:1 RESTV-ZEBOV screen but not to singly                                                                                                                                                                                               |
| ZEBOV  | Megaderma_lyra            | 0                  | 0   | 56        | 0    | 56         | FILO-L    | 56                     | NA        | NA                  | Olival et al. 2013    |                                                                                                                                                                                                                                                               |
| RETV   | Megaderma_lyra            | 0                  | 0   | 56        | 0    | 56         | FILO-L    | 56                     | NA        | NA                  | Olival et al. 2013    |                                                                                                                                                                                                                                                               |
| screen | Megaderma_lyra            | 0                  | 0   | 56        | 0    | 56         | FILO-L    | 56                     | NA        | NA                  | Olival et al. 2013    | Number that reacted to 1:1 RESTV-ZEBOV screen but not to singly                                                                                                                                                                                               |
| RETV   | Rousettus_leschenaultii   | 1                  | 1   | 141       | 0    | 141        | FILO-L    | 141                    | NA        | NA                  | Olival et al. 2013    | One sample more reactive to RESTV than ZEBOV                                                                                                                                                                                                                  |
| screen | Rousettus_leschenaultii   | 1                  | 15  | 141       | 0    | 141        | FILO-L    | 141                    | NA        | NA                  | Olival et al. 2013    | Number that reacted to 1:1 RESTV-ZEBOV screen but not to singly                                                                                                                                                                                               |
| ZEBOV  | Epomops_franqueti         | 1                  | 25  | 725       | NA   | NA         | NA        | 725                    | NA        | NA                  | Pourrut et al. 2007   |                                                                                                                                                                                                                                                               |
| ZEBOV  | Hypsingathus_monstrosus   | 1                  | 5   | 111       | NA   | NA         | NA        | 111                    | NA        | NA                  | Pourrut et al. 2009   |                                                                                                                                                                                                                                                               |
| ZEBOV  | Myonycteris_torquata      | 1                  | 10  | 554       | NA   | NA         | NA        | 554                    | NA        | NA                  | Pourrut et al. 2007   |                                                                                                                                                                                                                                                               |
| ZEBOV  | Casinycteris_argynis      | 1                  | 0   | 18        | NA   | NA         | NA        | 18                     | NA        | NA                  | Pourrut et al. 2009   |                                                                                                                                                                                                                                                               |
| MARV   | Casinycteris_argynis      | 1                  | 0   | 18        | NA   | NA         | NA        | 18                     | NA        | NA                  | Pourrut et al. 2009   |                                                                                                                                                                                                                                                               |
| ZEBOV  | Eidolon_heckum            | 1                  | 0   | 49        | NA   | NA         | NA        | 49                     | NA        | NA                  | Pourrut et al. 2009   |                                                                                                                                                                                                                                                               |
| MARV   | Eidolon_heckum            | 1                  | 0   | 47        | NA   | NA         | NA        | 47                     | NA        | NA                  | Pourrut et al. 2009   |                                                                                                                                                                                                                                                               |
| MARV   | Epomops_franqueti         | 1                  | 2   | 679       | NA   | NA         | NA        | 679                    | NA        | NA                  | Pourrut et al. 2009   |                                                                                                                                                                                                                                                               |
| ZEBOV  | Epomops_franqueti         | 1                  | 36  | 805       | NA   | NA         | NA        | 805                    | NA        | NA                  | Pourrut et al. 2009   |                                                                                                                                                                                                                                                               |
| ZEBOV  | Hipposideros_gigas        | 0                  | 3   | 24        | NA   | NA         | NA        | 24                     | NA        | NA                  | Pourrut et al. 2009   | H. gigas samples were pooled with M. condylurus samples in this study; positive results are for the pooled sample containing both species.                                                                                                                    |
| MARV   | Hypsingathus_monstrosus   | 1                  | 1   | 103       | NA   | NA         | NA        | 103                    | NA        | NA                  | Pourrut et al. 2009   |                                                                                                                                                                                                                                                               |
| ZEBOV  | Hypsingathus_monstrosus   | 1                  | 9   | 125       | NA   | NA         | NA        | 125                    | NA        | NA                  | Pourrut et al. 2009   |                                                                                                                                                                                                                                                               |
| MARV   | Megaloglossus_woermanni   | 1                  | 0   | 39        | NA   | NA         | NA        | 39                     | NA        | NA                  | Pourrut et al. 2009   |                                                                                                                                                                                                                                                               |
| ZEBOV  | Megaloglossus_woermanni   | 1                  | 0   | 49        | NA   | NA         | NA        | 49                     | NA        | NA                  | Pourrut et al. 2009   |                                                                                                                                                                                                                                                               |
| MARV   | Micropteropus_pusillus    | 1                  | 1   | 177       | NA   | NA         | NA        | 177                    | NA        | NA                  | Pourrut et al. 2009   |                                                                                                                                                                                                                                                               |
| ZEBOV  | Micropteropus_pusillus    | 1                  | 4   | 197       | NA   | NA         | NA        | 197                    | NA        | NA                  | Pourrut et al. 2009   |                                                                                                                                                                                                                                                               |
| ZEBOV  | Mops_condylurus           | 0                  | 3   | 24        | NA   | NA         | NA        | 24                     | NA        | NA                  | Pourrut et al. 2009   | H. gigas samples were pooled with M. condylurus samples in this study; positive results are for the pooled sample containing both species.                                                                                                                    |
| MARV   | Myonycteris_torquata      | 1                  | 0   | 493       | NA   | NA         | NA        | 493                    | NA        | NA                  | Pourrut et al. 2009   |                                                                                                                                                                                                                                                               |
| ZEBOV  | Myonycteris_torquata      | 1                  | 19  | 573       | NA   | NA         | NA        | 573                    | NA        | NA                  | Pourrut et al. 2009   |                                                                                                                                                                                                                                                               |
| MARV   | Rousettus_ateles          | 1                  | 21  | 299       | NA   | NA         | NA        | 299                    | NA        | NA                  | Pourrut et al. 2009   |                                                                                                                                                                                                                                                               |
| ZEBOV  | Rousettus_ateles          | 1                  | 24  | 307       | NA   | NA         | NA        | 307                    | NA        | NA                  | Pourrut et al. 2009   |                                                                                                                                                                                                                                                               |
| ZEBOV  | Casinycteris_ophiodon     | 1                  | 0   | 1         | 0    | 1          | FILO-L    | 1                      | NA        | NA                  | Saéz et al. 2015      | "Attempts to demonstrate the presence of Ebola antibodies against Ebola viruses were inconclusive"                                                                                                                                                            |
| ZEBOV  | Chaerephon_gumilus        | 1                  | 0   | 1         | 0    | 1          | FILO-L    | 1                      | NA        | NA                  | Saéz et al. 2015      | "Attempts to demonstrate the presence of Ebola antibodies against Ebola viruses were inconclusive"                                                                                                                                                            |
| ZEBOV  | Eidolon_heckum            | 1                  | 0   | 6         | 0    | 6          | FILO-L    | 6                      | NA        | NA                  | Saéz et al. 2015      | "Attempts to demonstrate the presence of Ebola antibodies against Ebola viruses were inconclusive"                                                                                                                                                            |
| ZEBOV  | Epomops_buettikoferi      | 1                  | 0   | 17        | 0    | 17         | FILO-L    | 17                     | NA        | NA                  | Saéz et al. 2015      | "Attempts to demonstrate the presence of Ebola antibodies against Ebola viruses were inconclusive"                                                                                                                                                            |
| ZEBOV  | Hipposideros_caffer       | 0                  | 0   | 18        | 0    | 18         | FILO-L    | 18                     | NA        | NA                  | Saéz et al. 2015      | "Attempts to demonstrate the presence of Ebola antibodies against Ebola viruses were inconclusive"                                                                                                                                                            |
| ZEBOV  | Hipposideros_cyclops      | 0                  | 0   | 23        | 0    | 23         | FILO-L    | 23                     | NA        | NA                  | Saéz et al. 2015      | "Attempts to demonstrate the presence of Ebola antibodies against Ebola viruses were inconclusive"                                                                                                                                                            |
| ZEBOV  | Hipposideros_jonesi       | 0                  | 0   | 1         | 0    | 1          | FILO-L    | 1                      | NA        | NA                  | Saéz et al. 2015      | "Attempts to demonstrate the presence of Ebola antibodies against Ebola viruses were inconclusive"                                                                                                                                                            |
| ZEBOV  | Hypsingathus_monstrosus   | 1                  | 0   | 1         | 0    | 1          | FILO-L    | 1                      | NA        | NA                  | Saéz et al. 2015      | "Attempts to demonstrate the presence of Ebola antibodies against Ebola viruses were inconclusive"                                                                                                                                                            |
| ZEBOV  | Lissonycteris_angolensis  | 1                  | 0   | 45        | 0    | 45         | FILO-L    | 45                     | NA        | NA                  | Saéz et al. 2015      | "Attempts to demonstrate the presence of Ebola antibodies against Ebola viruses were inconclusive"                                                                                                                                                            |
| ZEBOV  | Megaloglossus_woermanni   | 1                  | 0   | 3         | 0    | 3          | FILO-L    | 3                      | NA        | NA                  | Saéz et al. 2015      | "Attempts to demonstrate the presence of Ebola antibodies against Ebola viruses were inconclusive"                                                                                                                                                            |
| ZEBOV  | Mops_condylurus           | 0                  | 0   | 1         | 0    | 1          | FILO-L    | 1                      | NA        | NA                  | Saéz et al. 2015      | "Attempts to demonstrate the presence of Ebola antibodies against Ebola viruses were inconclusive"                                                                                                                                                            |
| ZEBOV  | Myonycteris_leschenaultii | 1                  | 0   | 21        | 0    | 21         | FILO-L    | 21                     | NA        | NA                  | Saéz et al. 2015      | "Attempts to demonstrate the presence of Ebola antibodies against Ebola viruses were inconclusive"                                                                                                                                                            |
| ZEBOV  | Nanonycteris_vedikampii   | 1                  | 0   | 17        | 0    | 17         | FILO-L    | 17                     | NA        | NA                  | Saéz et al. 2015      | "Attempts to demonstrate the presence of Ebola antibodies against Ebola viruses were inconclusive"                                                                                                                                                            |
| MARV   | Hipposideros_caffer       | 0                  | 0   | 10        | 0    | 7          | MARV-VP35 | 13                     | 0         | 13                  | Swanepoel et al. 2007 |                                                                                                                                                                                                                                                               |
| MARV   | Hipposideros_commersoni   | 1                  | 0   | 16        | 0    | 1          | MARV-VP35 | 17                     | 0         | 17                  | Swanepoel et al. 2007 |                                                                                                                                                                                                                                                               |
| MARV   | Lissonycteris_angolensis  | 1                  | 0   | 3         | 0    | 3          | MARV-VP35 | 3                      | 0         | 3                   | Swanepoel et al. 2007 |                                                                                                                                                                                                                                                               |
| MARV   | Miniopterus_inflatus      | 0                  | 0   | 34        | 1    | 33         | MARV-VP35 | 38                     | 0         | 38                  | Swanepoel et al. 2007 |                                                                                                                                                                                                                                                               |
| MARV   | Nycteris_hispida          | 0                  | 0   | 1         | 0    | 1          | MARV-VP35 | 1                      |           |                     |                       |                                                                                                                                                                                                                                                               |

|           |                           |   |                   |          |          |           |           |          |          |                              |                                                                                                                                                                                                                 |
|-----------|---------------------------|---|-------------------|----------|----------|-----------|-----------|----------|----------|------------------------------|-----------------------------------------------------------------------------------------------------------------------------------------------------------------------------------------------------------------|
| universal | Rhinolophus_eloquens      | 0 | see note see note | 0        | 222      | FILO-L    | 222       | see note | see note | Swanepoel et al. 2007        | Same # of isolation attempts as PCR. More FILO-L sequencing attempts than MARV-specific, but a MARV-specific PCR came back positive (no positives for FILO-L).                                                  |
| universal | Rhinolophus_lanetti       | 1 | see note see note | 0        |          | FILO-L    | 1         | see note | see note | Swanepoel et al. 2007        | Same # of isolation attempts as PCR. More FILO-L sequencing attempts than MARV-specific, but a MARV-specific PCR came back positive (no positives for FILO-L).                                                  |
| universal | Rousettus_ayeythawensis   | 1 | see note see note | 0        | 230      | FILO-L    | 230       | see note | see note | Swanepoel et al. 2007        | Same # of isolation attempts as PCR. More FILO-L sequencing attempts than MARV-specific, but a MARV-specific PCR came back positive (no positives for FILO-L).                                                  |
| RETV      | Cynopterus_brachyotis     | 1 | 0                 | 35       | NA       | NA        | 35        | NA       | NA       | Tanguchi et al. 2011         |                                                                                                                                                                                                                 |
| RETV      | Emballonura_jeffersoni    | 1 | 0                 | 9        | NA       | NA        | 9         | NA       | NA       | Tanguchi et al. 2011         |                                                                                                                                                                                                                 |
| RETV      | Eonycteris_splaea         | 1 | 0                 | 5        | NA       | NA        | 5         | NA       | NA       | Tanguchi et al. 2011         |                                                                                                                                                                                                                 |
| RETV      | Haplonycteris_fischeri    | 1 | 0                 | 6        | NA       | NA        | 6         | NA       | NA       | Tanguchi et al. 2011         |                                                                                                                                                                                                                 |
| RETV      | Hipposideros_glademana    | 1 | 0                 | 1        | NA       | NA        | 1         | NA       | NA       | Tanguchi et al. 2011         |                                                                                                                                                                                                                 |
| RETV      | Macroglossus_minimus      | 1 | 0                 | 2        | NA       | NA        | 2         | NA       | NA       | Tanguchi et al. 2011         |                                                                                                                                                                                                                 |
| RETV      | Miniopterus_australis     | 0 | 0                 | 8        | NA       | NA        | 8         | NA       | NA       | Tanguchi et al. 2011         |                                                                                                                                                                                                                 |
| RETV      | Miniopterus_macrotratus   | 0 | 0                 | 1        | NA       | NA        | 1         | NA       | NA       | Tanguchi et al. 2011         |                                                                                                                                                                                                                 |
| RETV      | Miniopterus_schreibersii  | 0 | 0                 | 8        | NA       | NA        | 8         | NA       | NA       | Tanguchi et al. 2011         |                                                                                                                                                                                                                 |
| RETV      | Miniopterus_tristis       | 0 | 0                 | 1        | NA       | NA        | 1         | NA       | NA       | Tanguchi et al. 2011         |                                                                                                                                                                                                                 |
| RETV      | Pipistrellus_javanicus    | 0 | 0                 | 2        | NA       | NA        | 2         | NA       | NA       | Tanguchi et al. 2011         |                                                                                                                                                                                                                 |
| RETV      | Pteronotus_jagori         | 1 | 0                 | 38       | NA       | NA        | 38        | NA       | NA       | Tanguchi et al. 2011         |                                                                                                                                                                                                                 |
| RETV      | Rhinolophus_arcuatus      | 0 | 0                 | 1        | NA       | NA        | 1         | NA       | NA       | Tanguchi et al. 2011         |                                                                                                                                                                                                                 |
| RETV      | Rhinolophus_rufus         | 0 | 0                 | 2        | NA       | NA        | 2         | NA       | NA       | Tanguchi et al. 2011         |                                                                                                                                                                                                                 |
| RETV      | Rousettus_amplicaudatus   | 1 | 7                 | 16       | 0        | 16        | RESTV-NP  | 16       | NA       | Tanguchi et al. 2011         |                                                                                                                                                                                                                 |
| RETV      | Scotophilus_julii         | 0 | 0                 | 5        | NA       | NA        | 5         | NA       | NA       | Tanguchi et al. 2011         |                                                                                                                                                                                                                 |
| MARV      | Casinycteris_argynnis     | 1 | 0                 | 0        | 2        | MARV-VP35 | 2         | NA       | NA       | Towner et al. 2007           |                                                                                                                                                                                                                 |
| MARV      | Eidolon_heckum            | 1 | 0                 | 33       | 0        | 35        | MARV-VP35 | 35       | NA       | Towner et al. 2007           | Ab testing only for bats at sites with PCR+ individuals.                                                                                                                                                        |
| MARV      | Epomops_franqueti         | 1 | 0                 | 47       | 0        | 296       | MARV-VP35 | 296      | NA       | Towner et al. 2007           | Ab testing only for bats at sites with PCR+ individuals.                                                                                                                                                        |
| MARV      | Hipposideros_gigas        | 0 | 0                 | 1        | 0        | 1         | MARV-VP35 | 1        | NA       | Towner et al. 2007           | Ab testing only for bats at sites with PCR+ individuals.                                                                                                                                                        |
| MARV      | Hypsiphatous_monstrosus   | 1 | 0                 | 12       | 0        | 56        | MARV-VP35 | 56       | NA       | Towner et al. 2007           | Ab testing only for bats at sites with PCR+ individuals.                                                                                                                                                        |
| MARV      | Megalopterosus_woermanni  | 1 | 0                 | 20       | 0        | 37        | MARV-VP35 | 37       | NA       | Towner et al. 2007           | Ab testing only for bats at sites with PCR+ individuals.                                                                                                                                                        |
| MARV      | Micropteropus_ausulius    | 1 | 0                 | 149      | 0        | 149       | MARV-VP35 | 149      | NA       | Towner et al. 2007           | Ab testing only for bats at sites with PCR+ individuals.                                                                                                                                                        |
| MARV      | Myonycteris_torquata      | 1 | 0                 | 55       | 0        | 263       | MARV-VP35 | 264      | NA       | Towner et al. 2007           | Ab testing only for bats at sites with PCR+ individuals.                                                                                                                                                        |
| MARV      | Rousettus_ayeythawensis   | 1 | 29                | 242      | 4        | 284       | MARV-VP35 | 284      | NA       | Towner et al. 2007           | Ab testing only for bats at sites with PCR+ individuals.                                                                                                                                                        |
| MARV      | Rousettus_ayeythawensis   | 1 | 13                | 540      | 11       | 611       | MARV-VP35 | 611      | 5        | see note                     | 13 definitely positive, 78 intermediate, 455 definite negatives. N and VP40 primers also used. Virus isolated from 5 bats, unclear how many tested.                                                             |
| RETV      | Cynopterus_sphinx         | 1 | 2                 | 2        | see note | see note  | FILO-L    | 2        | NA       | Yuan et al. 2012             | Screen RESTV only, Ab+ retested with RESTV and ZEBOV (authors recommend 1:1 RESTV/ZEBOV to detect more.) PCR testing was done for some individuals, all came back negative, results not given by species.       |
| RETV      | Hipposideros_armiger      | 0 | 0                 | 41       | see note | see note  | FILO-L    | 41       | NA       | Yuan et al. 2012             | Screen RESTV only, Ab+ retested with RESTV and ZEBOV (authors recommend 1:1 RESTV/ZEBOV to detect more.) PCR testing was done for some individuals, all came back negative, results not given by species.       |
| RETV      | Hipposideros_cata         | 0 | 0                 | 113      | see note | see note  | FILO-L    | 113      | NA       | Yuan et al. 2012             | Screen RESTV only, Ab+ retested with RESTV and ZEBOV (authors recommend 1:1 RESTV/ZEBOV to detect more.) PCR testing was done for some individuals, all came back negative, results not given by species.       |
| RETV      | Hipposideros_lavatus      | 0 | 0                 | 21       | see note | see note  | FILO-L    | 21       | NA       | Yuan et al. 2012             | Screen RESTV only, Ab+ retested with RESTV and ZEBOV (authors recommend 1:1 RESTV/ZEBOV to detect more.) PCR testing was done for some individuals, all came back negative, results not given by species.       |
| RETV      | Hipposideros_pomona       | 0 | 3                 | 39       | see note | see note  | FILO-L    | 39       | NA       | Yuan et al. 2012             | Screen RESTV only, Ab+ retested with RESTV and ZEBOV (authors recommend 1:1 RESTV/ZEBOV to detect more.) PCR testing was done for some individuals, all came back negative, results not given by species.       |
| RETV      | Miniopterus_schreibersii  | 0 | 2                 | 23       | see note | see note  | FILO-L    | 23       | NA       | Yuan et al. 2012             | Screen RESTV only, Ab+ retested with RESTV and ZEBOV (authors recommend 1:1 RESTV/ZEBOV to detect more.) PCR testing was done for some individuals, all came back negative, results not given by species.       |
| RETV      | Myotis_chilonensis        | 0 | 0                 | 6        | see note | see note  | FILO-L    | 6        | NA       | Yuan et al. 2012             | Screen RESTV only, Ab+ retested with RESTV and ZEBOV (authors recommend 1:1 RESTV/ZEBOV to detect more.) PCR testing was done for some individuals, all came back negative, results not given by species.       |
| RETV      | Myotis_dubautoni          | 0 | 0                 | 24       | see note | see note  | FILO-L    | 24       | NA       | Yuan et al. 2012             | Screen RESTV only, Ab+ retested with RESTV and ZEBOV (authors recommend 1:1 RESTV/ZEBOV to detect more.) PCR testing was done for some individuals, all came back negative, results not given by species.       |
| RETV      | Myotis_davidi             | 0 | 0                 | 5        | see note | see note  | FILO-L    | 5        | NA       | Yuan et al. 2012             | Screen RESTV only, Ab+ retested with RESTV and ZEBOV (authors recommend 1:1 RESTV/ZEBOV to detect more.) PCR testing was done for some individuals, all came back negative, results not given by species.       |
| RETV      | Myotis_fortis             | 0 | 2                 | see note | see note | see note  | FILO-L    | 2        | NA       | Yuan et al. 2012             | Screen RESTV only, Ab+ retested with RESTV and ZEBOV (authors recommend 1:1 RESTV/ZEBOV to detect more.) PCR testing was done for some individuals, all came back negative, results not given by species.       |
| RETV      | Myotis_ricketti           | 0 | 4                 | 83       | see note | see note  | FILO-L    | 83       | NA       | Yuan et al. 2012             | Screen RESTV only, Ab+ retested with RESTV and ZEBOV (authors recommend 1:1 RESTV/ZEBOV to detect more.) PCR testing was done for some individuals, all came back negative, results not given by species.       |
| RETV      | Pipistrellus_pipistrellus | 0 | 4                 | 35       | see note | see note  | FILO-L    | 35       | NA       | Yuan et al. 2012             | Screen RESTV only, Ab+ retested with RESTV and ZEBOV (authors recommend 1:1 RESTV/ZEBOV to detect more.) PCR testing was done for some individuals, all came back negative, results not given by species.       |
| RETV      | Rhinolophus_affinis       | 0 | 0                 | 69       | see note | see note  | FILO-L    | 69       | NA       | Yuan et al. 2012             | Screen RESTV only, Ab+ retested with RESTV and ZEBOV (authors recommend 1:1 RESTV/ZEBOV to detect more.) PCR testing was done for some individuals, all came back negative, results not given by species.       |
| RETV      | Rhinolophus_ferrugineum   | 0 | 0                 | 15       | see note | see note  | FILO-L    | 15       | NA       | Yuan et al. 2012             | Screen RESTV only, Ab+ retested with RESTV and ZEBOV (authors recommend 1:1 RESTV/ZEBOV to detect more.) PCR testing was done for some individuals, all came back negative, results not given by species.       |
| RETV      | Rhinolophus_pearsoni      | 0 | 0                 | 3        | see note | see note  | FILO-L    | 3        | NA       | Yuan et al. 2012             | Screen RESTV only, Ab+ retested with RESTV and ZEBOV (authors recommend 1:1 RESTV/ZEBOV to detect more.) PCR testing was done for some individuals, all came back negative, results not given by species.       |
| RETV      | Rhinolophus_pusillus      | 0 | 0                 | 14       | see note | see note  | FILO-L    | 14       | NA       | Yuan et al. 2012             | Screen RESTV only, Ab+ retested with RESTV and ZEBOV (authors recommend 1:1 RESTV/ZEBOV to detect more.) PCR testing was done for some individuals, all came back negative, results not given by species.       |
| RETV      | Rhinolophus_pusillus      | 0 | 6                 | see note | see note | see note  | FILO-L    | 6        | NA       | Yuan et al. 2012             | Screen RESTV only, Ab+ retested with RESTV and ZEBOV (authors recommend 1:1 RESTV/ZEBOV to detect more.) PCR testing was done for some individuals, all came back negative, results not given by species.       |
| RETV      | Rousettus_leschenaulti    | 1 | 11                | 126      | see note | see note  | FILO-L    | 126      | NA       | Yuan et al. 2012             | Screen RESTV only, Ab+ retested with RESTV and ZEBOV (authors recommend 1:1 RESTV/ZEBOV to detect more.) PCR testing was done for some individuals, all came back negative, results not given by species.       |
| RETV      | Scotophilus_kuhli         | 0 | 1                 | 25       | see note | see note  | FILO-L    | 25       | NA       | Yuan et al. 2012             | Screen RESTV only, Ab+ retested with RESTV and ZEBOV (authors recommend 1:1 RESTV/ZEBOV to detect more.) PCR testing was done for some individuals, all came back negative, results not given by species.       |
| ZEBOV     | Miniopterus_schreibersii  | 0 | 1                 | 23       | see note | see note  | FILO-L    | 23       | NA       | Yuan et al. 2012             | Screened with RESTV; 32 RESTV+, 25 ZEBOV Ab+ EUSA and/or WB; not all positives listed by species.                                                                                                               |
| ZEBOV     | Rousettus_leschenaulti    | 1 | 10                | 126      | see note | see note  | FILO-L    | 126      | NA       | Yuan et al. 2012             | Screened with RESTV; 32 RESTV+, 25 ZEBOV Ab+ EUSA and/or WB; not all positives listed by species.                                                                                                               |
| ZEBOV     | Cynopterus_sphinx         | 1 | 1                 | 2        | see note | see note  | FILO-L    | 2        | NA       | Yuan et al. 2012             | Screened with RESTV; 32 RESTV+, 25 ZEBOV Ab+ EUSA and/or WB; not all positives listed by species.                                                                                                               |
| ZEBOV     | Hipposideros_pomona       | 0 | 1                 | 39       | see note | see note  | FILO-L    | 39       | NA       | Yuan et al. 2012             | Screened with RESTV; 32 RESTV+, 25 ZEBOV Ab+ EUSA and/or WB; not all positives listed by species.                                                                                                               |
| ZEBOV     | Pipistrellus_pipistrellus | 1 | 2                 | 35       | see note | see note  | FILO-L    | 35       | NA       | Yuan et al. 2012             | Screened with RESTV; 32 RESTV+, 25 ZEBOV Ab+ EUSA and/or WB; not all positives listed by species.                                                                                                               |
| ZEBOV     | Eidolon_heckum            | 1 | 19                | 748      | 0        | 748       | FILO-NP   | 748      | NA       | Ogawa et al. 2015            | Screened for all Ab, universal primers used.                                                                                                                                                                    |
| SUV       | Eidolon_heckum            | 1 | 19                | 748      | 0        | 748       | FILO-NP   | 748      | NA       | Ogawa et al. 2015            | Screened for all Ab, universal primers used.                                                                                                                                                                    |
| MARV      | Eidolon_heckum            | 1 | 7                 | 748      | 0        | 748       | FILO-NP   | 748      | NA       | Ogawa et al. 2015            | Screened for all Ab, universal primers used.                                                                                                                                                                    |
| TAFV      | Eidolon_heckum            | 1 | 9                 | 748      | 0        | 748       | FILO-NP   | 748      | NA       | Ogawa et al. 2015            | Screened for all Ab, universal primers used.                                                                                                                                                                    |
| BDV       | Eidolon_heckum            | 1 | 8                 | 748      | 0        | 748       | FILO-NP   | 748      | NA       | Ogawa et al. 2015            | Screened for all Ab, universal primers used.                                                                                                                                                                    |
| MARV      | Eidolon_heckum            | 1 | 7                 | 748      | 0        | 748       | FILO-NP   | 748      | NA       | Ogawa et al. 2015            | Screened for all Ab, universal primers used. Authors tested 748, not 300, for MARV.                                                                                                                             |
| ZEBOV     | Pteropus_yeti             | 0 | 0                 | 500      | NA       | NA        | 500       | NA       | NA       | Wacharapluksadee et al. 2015 |                                                                                                                                                                                                                 |
| universal | Cynopterus_brachyotis     | 1 | NA                | NA       | 0        | 10        | FILO-L    | 10       | NA       | Wacharapluksadee et al. 2015 | Used consensus primer (FILO-L) for all filoviruses                                                                                                                                                              |
| universal | Cynopterus_sphinx         | 1 | NA                | NA       | 0        | 4         | FILO-L    | 4        | NA       | Wacharapluksadee et al. 2015 | Used consensus primer (FILO-L) for all filoviruses                                                                                                                                                              |
| universal | Eonycteris_splaea         | 1 | NA                | NA       | 0        | 12        | FILO-L    | 12       | NA       | Wacharapluksadee et al. 2015 | Used consensus primer (FILO-L) for all filoviruses                                                                                                                                                              |
| universal | Macroglossus_scribnus     | 1 | NA                | NA       | 0        | 2         | FILO-L    | 2        | NA       | Wacharapluksadee et al. 2015 | Used consensus primer (FILO-L) for all filoviruses                                                                                                                                                              |
| universal | Megaerops_niphanae        | 1 | NA                | NA       | 0        | 1         | FILO-L    | 1        | NA       | Wacharapluksadee et al. 2015 | Used consensus primer (FILO-L) for all filoviruses                                                                                                                                                              |
| universal | Rousettus_amplicaudatus   | 0 | NA                | NA       | 0        | 3         | FILO-L    | 3        | NA       | Wacharapluksadee et al. 2015 | Used consensus primer (FILO-L) for all filoviruses                                                                                                                                                              |
| universal | Hipposideros_armiger      | 0 | NA                | NA       | 0        | 113       | FILO-L    | 113      | NA       | Wacharapluksadee et al. 2015 | Used consensus primer (FILO-L) for all filoviruses                                                                                                                                                              |
| universal | Hipposideros_cinereus     | 0 | NA                | NA       | 0        | 4         | FILO-L    | 4        | NA       | Wacharapluksadee et al. 2015 | Used consensus primer (FILO-L) for all filoviruses                                                                                                                                                              |
| universal | Hipposideros_lavatus      | 0 | NA                | NA       | 0        | 33        | FILO-L    | 33       | NA       | Wacharapluksadee et al. 2015 | Used consensus primer (FILO-L) for all filoviruses                                                                                                                                                              |
| universal | Hipposideros_lesaguii     | 0 | NA                | NA       | 0        | 158       | FILO-L    | 158      | NA       | Wacharapluksadee et al. 2015 | Used consensus primer (FILO-L) for all filoviruses                                                                                                                                                              |
| universal | Megaderma_lyra            | 0 | NA                | NA       | 0        | 1         | FILO-L    | 1        | NA       | Wacharapluksadee et al. 2015 | Used consensus primer (FILO-L) for all filoviruses                                                                                                                                                              |
| universal | Miniopterus_maginate      | 0 | NA                | NA       | 0        | 132       | FILO-L    | 132      | NA       | Wacharapluksadee et al. 2015 | Used consensus primer (FILO-L) for all filoviruses                                                                                                                                                              |
| universal | Miniopterus_pusillus      | 0 | NA                | NA       | 0        | 1         | FILO-L    | 1        | NA       | Wacharapluksadee et al. 2015 | Used consensus primer (FILO-L) for all filoviruses                                                                                                                                                              |
| universal | Miniopterus_schreibersii  | 0 | NA                | NA       | 0        | 22        | FILO-L    | 22       | NA       | Wacharapluksadee et al. 2015 | Used consensus primer (FILO-L) for all filoviruses                                                                                                                                                              |
| universal | Myotis_borfieldi          | 0 | NA                | NA       | 0        | 6         | FILO-L    | 6        | NA       | Wacharapluksadee et al. 2015 | Used consensus primer (FILO-L) for all filoviruses                                                                                                                                                              |
| universal | Myotis_munzschii          | 0 | NA                | NA       | 0        | 1         | FILO-L    | 1        | NA       | Wacharapluksadee et al. 2015 | Used consensus primer (FILO-L) for all filoviruses                                                                                                                                                              |
| universal | Rhinolophus_shamei        | 0 | NA                | NA       | 0        | 44        | FILO-L    | 44       | NA       | Wacharapluksadee et al. 2015 | Used consensus primer (FILO-L) for all filoviruses                                                                                                                                                              |
| universal | Rhinolophus_celophyllus   | 0 | NA                | NA       | 0        | 7         | FILO-L    | 7        | NA       | Wacharapluksadee et al. 2015 | Used consensus primer (FILO-L) for all filoviruses                                                                                                                                                              |
| universal | Rhinolophus_luctus        | 0 | NA                | NA       | 0        | 1         | FILO-L    | 1        | NA       | Wacharapluksadee et al. 2015 | Used consensus primer (FILO-L) for all filoviruses                                                                                                                                                              |
| universal | Rhinolophus_malayanus     | 0 | NA                | NA       | 0        | 4         | FILO-L    | 4        | NA       | Wacharapluksadee et al. 2015 | Used consensus primer (FILO-L) for all filoviruses                                                                                                                                                              |
| universal | Rhinolophus_microglobosus | 0 | NA                | NA       | 0        | 1         | FILO-L    | 1        | NA       | Wacharapluksadee et al. 2015 | Used consensus primer (FILO-L) for all filoviruses                                                                                                                                                              |
| universal | Rhinolophus_pusillus      | 0 | NA                | NA       | 0        | 1         | FILO-L    | 1        | NA       | Wacharapluksadee et al. 2015 | Used consensus primer (FILO-L) for all filoviruses                                                                                                                                                              |
| universal | Scotophilus_kuhli         | 0 | NA                | NA       | 0        | 1         | FILO-L    | 1        | NA       | Wacharapluksadee et al. 2015 | Used consensus primer (FILO-L) for all filoviruses                                                                                                                                                              |
| universal | Taphozous_longimanus      | 0 | NA                | NA       | 0        | 27        | FILO-L    | 27       | NA       | Wacharapluksadee et al. 2015 | Used consensus primer (FILO-L) for all filoviruses                                                                                                                                                              |
| universal | Taphozous_melanogon       | 0 | NA                | NA       | 0        | 110       | FILO-L    | 110      | NA       | Wacharapluksadee et al. 2015 | Used consensus primer (FILO-L) for all filoviruses                                                                                                                                                              |
| LDV       | Miniopterus_schreibersii  | 0 | NA                | NA       | 20       | 70        | FILO-L    | 70       | NA       | Negredo et al. 2011          | PCR tested only (specialized filoviral L, and normal FILO-L and FILO-N). 25 carcasses collected during die-offs. 1295 bats later collected negative, not reported by species other than 45 negative schreibersi |
| LDV       | Myotis_myotis             | 1 | 2                 | 56       | 0        | 9         | FILO-L    | 9        | NA       | Negredo et al. 2011          | PCR tested only (specialized filoviral L, and normal FILO-L and FILO-N). 3 carcasses collected during die-off.                                                                                                  |
| LDV       | Rousettus_leschenaulti    | 1 | NA                | NA       | 1        | 29        | FILO-L    | 29       | NA       | He et al. 2015               | Filoviral primer returned virus with previously-unseen sequence; clusters with Ebolaviruses, basal to the BDOV/LOV clade.                                                                                       |
| ZEBOV     | Acerodon_jabatus          | 1 | 1                 | 56       | NA       | NA        | 56        | NA       | NA       | Jayme et al. 2015            | Screened 1:1, came back more specifically positive.                                                                                                                                                             |
| RETV      | Acerodon_jabatus          | 1 | 2                 | 56       | 0        | 56        | RESTV-NP  | 56       | NA       | Jayme et al. 2015            | Screened 1:1, came back more specifically positive.                                                                                                                                                             |
| ZEBOV     | Pteropus_vampyrus         | 1 | 0                 | 5        | NA       | NA        | 5         | NA       | NA       | Jayme et al. 2015            | Screened 1:1, came back more specifically positive.                                                                                                                                                             |
| RETV      | Pteropus_vampyrus         | 1 | 1                 | 5        | 0        | 5         | RESTV-NP  | 5        | NA       | Jayme et al. 2015            | Screened 1:1, came back more specifically positive.                                                                                                                                                             |
| RETV      | Miniopterus_schreibersii  | 0 | 0                 | 44       | 3        | 44        | RESTV-NP  | 44       | NA       | Jayme et al. 2015            | Screened 1:1, came back Ab-. All most 44 individuals tested; not all abts had all samples taken and authors did not specify.                                                                                    |

Amman, B. R., et al. (2012a). "Seasonal pulses of Marburg virus circulation in juvenile *R*

- Heideman, P. D. (1989). 'Delayed development in Fischer pygmy fruit bat, *Haploxycteris fischeri*, in the Philippines', *Journal of Reproduction and Fertility*, 85 (2), 363-82.
- Heideman, P. D. and Heaney, L. R. (1988). 'Population biology and estimates of abundance of fruit bats (Pteropodidae) in Philippine submontane rainforest', *Journal of Zoology*, 218, 565-86.
- Heideman, P. D. and Powell, K. S. (1998). 'Age-specific reproductive strategies and delayed embryonic development in an old world fruit bat, *Ptenochirus jagori*', *Journal of Mammalogy*, 79 (1), 295-311.
- Heideman, P. D. and Utzurrum, R. C. (2003a). 'Seasonality and synchrony of reproduction in three species of nectarivorous Philippines bats', *BMC Ecol*, 3, 11.
- Heideman, Paul D. and Utzurrum, Ruth C. B. (2003b). 'Seasonality and synchrony of reproduction in three species of nectarivorous Philippines bats', *BMC Ecology*, 3 (11 Cited January 8, 2004).
- Hickey, M. B. C. and Dunlop, J. M. (2000). 'Nycteris grandis', *Mammalian Species*, (632), 1-4.
- Ho, Y. Y. and Lee, L. L. (2003). 'Roost selection by Formosan leaf-nosed bats (*Hipposideros armiger terasensis*)', *Zoolog Sci*, 20 (8), 1017-24.
- Jayme, Sarah L., Hume, E., Field, Carol de Jong, Kevin I., Olival, Glenn Marsh, Arnon M. Tagag, Tom Hughes, et al. "Molecular Evidence of Ebola Reston Virus Infection in Philippine Bats." *Virology Journal* 12, no. 1 (July 17, 2015): 107. doi:10.1186/s12985-015-0311-3.
- Jin, Longju, et al. (2010). 'Postnatal growth and age estimation in the sally leaf-nosed bat, *Hipposideros crenatus*', *Acta Chiropterologica*, 12 (1), 155-60.
- Krishna, A. and Dominic, C. J. (1983). 'Reproduction in the female short-nosed fruit bat *Cynopterus sphinx* Vahl', *Periodicum Biologorum*, 85 (1), 23-30.
- Langevin, P. and Barclay, R. (1990). 'Hypsignathus monstrosus', *Mammalian Species*, 357, 1-4.
- Leis, et al. (1999). 'Search for the Ebola virus reservoir in Kikwit, Democratic Republic of the Congo: reflections on a vertebrate collection', *J Infect Dis*, 179 Suppl 1, S155-S163.
- Leroy, E. M., et al. (2005). 'Fruit bats as reservoirs of Ebola virus', *Nature*, 438 (7068), 575-6.
- Lin, A. Q., et al. (2011). 'Postnatal development in Andersen's leaf-nosed bat *Hipposideros pomona*: flight, wing shape, and wing bone lengths', *Zoology (Jena)*, 114 (2), 69-77.
- Lin, Ai-Qing, et al. (2010). 'Postnatal growth and age estimation in Horsfield's leaf-nosed bat *Hipposideros larvatus*', *Zoological Studies*, 49 (6), 789-96.
- Medway, L. (1971). 'Observations of social and reproductive biology of bent winged bat *Miniopterus australis* in northern Borneo', *Journal of Zoology*, 165 (OCT), 261-8.
- Negredo, Ana, Gustavo Palacios, Sonia Vázquez-Morón, Félix González, Herán Dopazo, Francisca Molero, Javier Juste, et al. "Discovery of an Ebolavirus-like Filovirus in Europe." *PLoS Pathog* 7, no. 10 (2011): e1002304.
- Nowak, R. M., Kunz, T. H., and Pierson, E. D. (1994). *Walker's Bats of the World* (Baltimore: The Johns Hopkins University Press).
- Ogawa, Hirohito, Hiroko Miyamoto, Eri Nakayama, Reiko Yoshida, Ichiro Nakamura, Hirofumi Sawo, Akhiro Ishii, et al. "Seroepidemiological Prevalence of Multiple Species of Filoviruses in Fruit Bats (Eidolon Helvum) Migrating in Africa." *The Journal of Infectious Diseases* 212 Suppl 2 (October 1, 2015): S101-108. doi:10.1093/infdis/jiv063.
- Oka, N. O. (1974). 'Breeding in Franquet's bat, *Epomops franqueti* (Tomes), in Uganda', *J Mammal*, 55 (2), 462-5.
- Olival, K. J., et al. (2013). 'Ebola virus antibodies in fruit bats, Bangladesh', *Emerg Infect Dis*, 19 (2), 270-3.
- Pourrut, X., et al. (2007). 'Spatial and temporal patterns of Zaire ebolavirus antibody prevalence in the possible reservoir bat species', *J Infect Dis*, 196 Suppl 2, S176-82.
- Pourrut, X., et al. (2009). 'Large serological survey showing cocirculation of Ebola and Marburg viruses in Gabonese bat populations, and a high seroprevalence of both viruses in *Rousettus aegyptiacus*', *BMC Infect Dis*, 9, 159.
- Richardson, E. G. (1977). 'Biology and evolution of reproductive cycle of *Miniopterus schreibersii* and *M. australis* (Chiroptera Vespertilionidae)', *Journal of Zoology*, 183 (NOV), 353-75.
- Rositter, S. J., et al. (2005). 'Mate fidelity and intra-lineage polygyny in greater horseshoe bats', *Nature*, 437 (7057), 408-11.
- Saiz, A.M., et al. (2015). 'Investigating the zoonotic origin of the West African Ebola epidemic', *EMBO molecular medicine*, 7 (1), 17-23.
- Sandhu, S. and Gopalakrishna, A. (1984). 'Some observations on the breeding biology of the Indian fruit bat, *Cynopterus sphinx* (Vahl) in central India', *Current Science*, 53 (22), 1189-92.
- Swanepoel, R., et al. (2007). 'Studies of reservoir hosts for Marburg virus', *Emerging Infectious Diseases*, 13 (12), 1847-51.
- Taniguchi, S., et al. (2011). 'Reston ebolavirus antibodies in bats, the Philippines', *Emerg Infect Dis*, 17 (8), 1559-60.
- Thomas, D. W. and Marshall, A. G. (1984). 'Reproduction and growth in 3 species of West African fruit bats', *Journal of Zoology*, 202 (FEB), 265-81.
- Towner, J. S., et al. (2007). 'Marburg virus infection detected in a common African bat', *PLoS One*, 2 (1), e764.
- Towner, J. S., et al. (2009). 'Isolation of genetically diverse Marburg viruses from Egyptian fruit bats', *PLoS Pathogens*, 5 (7), e1000536.
- Wacharaputadee, Susuporn, Kevin J. Olival, Budsabong Kanchanasaka, Prateep Duengkak, Supakarn Kaewchot, Phimchanok Srongmongkol, Gittiyaporn leamsard, et al. "Surveillance for Ebola Virus in Wildlife, Thailand." *Emerging Infectious Diseases* 21, no. 12 (December 2015): 2271-73. doi:10.3201/eid2112.150860.
- Wright, G. S. (2009). 'Hipposideros caffer (Chiroptera: Hipposideridae)', *Mammalian Species*, 845, 1-9.
- Yuan, J., et al. (2012). 'Serological evidence of ebolavirus infection in bats, China', *Viroi J*, 9, 236.
- Zubaid, A. and Davison, G. W. H. (1987). 'A comparative study of the baculum in peninsular Malaysian Hipposiderines', *Mammalia*, 51 (1), 139-44.
