# Supplementary material for: Undiscovered Bat Hosts of Filoviruses
Source: PubMed Central journal article supplement (PMC4945033; doi:10.1371/journal.pntd.0004815), 2016-07-14
Supplement: pntd.0004815.s004.pdf [file pntd.0004815.s004.pdf]

| Species                   | output     | label | probability |
|---------------------------|------------|-------|-------------|
| Rousettus_aegyptiacus     | 0.90642502 | 1     | 0.71226806  |
| Cynopterus_sphinx         | 0.83001727 | 1     | 0.69635858  |
| Rousettus_leschenaultii   | 0.78840058 | 1     | 0.6874878   |
| Rousettus_amplexicaudatus | 0.78618184 | 1     | 0.68701091  |
| Epomops_franqueti         | 0.73951351 | 1     | 0.67688947  |
| Miniopterus_schreibersii  | 0.58358838 | 1     | 0.64189267  |
| Hypsignathus_monstrosus   | 0.5633075  | 1     | 0.63721749  |
| Pipistrellus_pipistrellus | 0.51764116 | 1     | 0.62659602  |
| Mops_condylurus           | 0.43884416 | 1     | 0.60798358  |
| Miniopterus_inflatus      | 0.30201942 | 1     | 0.57493611  |
| Myonycteris_torquata      | 0.28886619 | 1     | 0.57171854  |
| Artibeus_lituratus        | 0.28006534 | 0     | 0.56956224  |
| Eidolon_helvum            | 0.26493532 | 1     | 0.56584911  |
| Rhinolophus_affinis       | 0.25408387 | 1     | 0.56318143  |
| Scotophilus_kuhlii        | 0.19338504 | 1     | 0.54819615  |
| Miniopterus_pusillus      | 0.1176852  | 1     | 0.52938739  |
| Rhinolophus_pusillus      | 0.11315528 | 0     | 0.52825867  |
| Pipistrellus_tenuis       | 0.0976695  | 0     | 0.52439798  |
| Tadarida_brasiliensis     | 0.09272254 | 0     | 0.52316404  |
| Eonycteris_spelaea        | 0.08844296 | 0     | 0.52209634  |
| Myotis_ricketti           | 0.08596453 | 1     | 0.52147791  |
| Megaderma_lyra            | 0.08139516 | 0     | 0.52033756  |
| Myotis_lucifugus          | 0.08097215 | 0     | 0.52023199  |
| Hipposideros_pomona       | 0.07853223 | 1     | 0.51962297  |
| Rhinolophus_ferrumequinum | 0.0783308  | 0     | 0.51957269  |
| Phyllostomus_hastatus     | 0.07603956 | 0     | 0.51900074  |
| Hipposideros_commerstoni  | 0.07337517 | 0     | 0.51833557  |
| Epomophorus_labiatum      | 0.07002816 | 0     | 0.51749989  |
| Pteropus_livingstonii     | 0.06337008 | 0     | 0.51583722  |
| Rhinolophus_monoceros     | 0.06226401 | 0     | 0.51556097  |
| Carollia_perspicillata    | 0.06115001 | 0     | 0.51528274  |
| Hipposideros_armiger      | 0.05969518 | 0     | 0.51491937  |
| Myotis_adversus           | 0.05799721 | 0     | 0.51449524  |
| Chaerephon_pumilus        | 0.05206168 | 0     | 0.51301248  |
| Rhinolophus_lepidus       | 0.05164175 | 0     | 0.51290757  |
| Artibeus_jamaicensis      | 0.04959917 | 0     | 0.51239725  |
| Dobsonia_magna            | 0.04758663 | 0     | 0.51189441  |
| Micropteropus_pusillus    | 0.04738362 | 1     | 0.51184369  |
| Otomops_martiensseni      | 0.04565115 | 0     | 0.51141081  |
| Tylonycteris_robustula    | 0.04557026 | 0     | 0.5113906   |
| Hypsugo_savii             | 0.04476219 | 0     | 0.51118868  |

|                         |            |   |            |
|-------------------------|------------|---|------------|
| Saccolaimus_saccolaimus | 0.04249051 | 0 | 0.51062103 |
| Rhinolophus_euryale     | 0.04095819 | 0 | 0.51023812 |
| Pteropus_rodricensis    | 0.0394427  | 0 | 0.5098594  |
| Miniopterus_australis   | 0.03919412 | 0 | 0.50979728 |
| Ptenochirus_jagori      | 0.03905807 | 0 | 0.50976328 |
| Dobsonia_moluccensis    | 0.03875868 | 0 | 0.50968846 |
| Pteropus_conspicillatus | 0.03816896 | 0 | 0.50954108 |
| Epomops_buettikoferi    | 0.03743002 | 0 | 0.50935641 |
| Pipistrellus_abramus    | 0.03621884 | 0 | 0.50905372 |
| Pteropus_ornatus        | 0.03590386 | 0 | 0.508975   |
| Platyrrhinus_lineatus   | 0.03569601 | 0 | 0.50892306 |
| Rhinolophus_sinicus     | 0.03494929 | 0 | 0.50873643 |
| Scotophilus_heathii     | 0.03361392 | 0 | 0.50840269 |
| Myotis_albescens        | 0.0332037  | 0 | 0.50830016 |
| Hipposideros_gigas      | 0.03298889 | 0 | 0.50824648 |
| Pteropus_giganteus      | 0.03040236 | 0 | 0.50760001 |
| Murina_leucogaster      | 0.03010533 | 0 | 0.50752577 |
| Epomophorus_gambianus   | 0.02921073 | 1 | 0.50730216 |
| Pteropus_pumilus        | 0.02811183 | 0 | 0.50702749 |
| Rhinolophus_eloquens    | 0.02806231 | 1 | 0.50701512 |
| Molossus_molossus       | 0.02798127 | 0 | 0.50699486 |
| Nanonycteris_veldkampii | 0.02796134 | 1 | 0.50698988 |
| Brachyphylla_cavernarum | 0.02695011 | 0 | 0.50673712 |
| Hipposideros_bicolor    | 0.02599054 | 0 | 0.50649727 |
| Myotis_fimbriatus       | 0.025055   | 0 | 0.50626342 |
| Myotis_myotis           | 0.02458106 | 0 | 0.50614496 |
| Rhinolophus_luctus      | 0.02404223 | 0 | 0.50601027 |
| Rhinolophus_cornutus    | 0.02359982 | 0 | 0.50589968 |
| Myotis_velifer          | 0.02295538 | 0 | 0.50573859 |
| Pteropus_melanotus      | 0.02267315 | 0 | 0.50566805 |
| Pteropus_scapulatus     | 0.02261674 | 0 | 0.50565394 |
| Cynopterus_brachyotis   | 0.02243074 | 0 | 0.50560745 |
| Dobsonia_praedatrix     | 0.02236608 | 0 | 0.50559129 |
| Peropteryx_kappleri     | 0.02185091 | 0 | 0.50546251 |
| Coleura_afra            | 0.02182309 | 0 | 0.50545556 |
| Eonycteris_major        | 0.02165709 | 0 | 0.50541406 |
| Taphozous_nudiventris   | 0.02155931 | 0 | 0.50538962 |
| Pteropus_tonganus       | 0.02136416 | 0 | 0.50534084 |
| Rhinolophus_acuminatus  | 0.02080617 | 0 | 0.50520136 |
| Rhinolophus_macrotis    | 0.02049502 | 0 | 0.50512358 |
| Mops_midas              | 0.02039519 | 0 | 0.50509862 |
| Nyctalus_lasiopterus    | 0.02033287 | 0 | 0.50508304 |

|                          |            |              |
|--------------------------|------------|--------------|
| Rhinolophus_shortridgei  | 0.02024302 | 0 0.50506058 |
| Pteropus_dasymallus      | 0.02024058 | 0 0.50505997 |
| Tylonycteris_pachypus    | 0.02012274 | 0 0.50503051 |
| Phyllostomus_discolor    | 0.01982018 | 0 0.50495488 |
| Pteropus_poliocephalus   | 0.01966413 | 0 0.50491587 |
| Hipposideros_speoris     | 0.01966386 | 0 0.50491581 |
| Artibeus_phaeotis        | 0.01943315 | 0 0.50485813 |
| Myotis_formosus          | 0.01925009 | 0 0.50481237 |
| Myotis_tricolor          | 0.01858738 | 0 0.50464671 |
| Macroglossus_minimus     | 0.01815186 | 0 0.50453784 |
| Megaderma_spasma         | 0.01806531 | 0 0.5045162  |
| Sturnira_aratathomasi    | 0.01793359 | 0 0.50448328 |
| Macroderma_gigas         | 0.01761412 | 0 0.50440342 |
| Artibeus_aztecus         | 0.01761046 | 0 0.5044025  |
| Corynorhinus_rafinesquii | 0.01759461 | 0 0.50439854 |
| Desmodus_rotundus        | 0.01758948 | 0 0.50439726 |
| Rhinopoma_microphyllum   | 0.01726881 | 0 0.5043171  |
| Coelops_frithii          | 0.01720833 | 0 0.50430198 |
| Pteropus_rayneri         | 0.01709237 | 0 0.50427299 |
| Eptesicus_fuscus         | 0.01707912 | 0 0.50426968 |
| Taphozous_melanopogon    | 0.01699819 | 0 0.50424944 |
| Brachyphylla_nana        | 0.01695387 | 0 0.50423837 |
| Chaerephon_plicatus      | 0.01689168 | 0 0.50422282 |
| Taphozous_perforatus     | 0.01683223 | 0 0.50420796 |
| Eumops_perotis           | 0.01672363 | 0 0.50418081 |
| Rhinolophus_maendeleo    | 0.0166908  | 0 0.5041726  |
| Rhinolophus_pearsonii    | 0.01667156 | 0 0.50416779 |
| Harpiocephalus_harpia    | 0.01665704 | 0 0.50416416 |
| Pipistrellus_ceyloicus   | 0.01662606 | 0 0.50415642 |
| Glossophaga_soricina     | 0.01656478 | 0 0.5041411  |
| Epomophorus_wahlbergi    | 0.0163717  | 0 0.50409283 |
| Pipistrellus_coromandra  | 0.01628393 | 0 0.50407089 |
| Pteropus_vampyrus        | 0.01617462 | 0 0.50404357 |
| Phoniscus_jagorii        | 0.01561271 | 0 0.5039031  |
| Taphozous_longimanus     | 0.01553617 | 0 0.50388396 |
| Rhinolophus_clivus       | 0.01540937 | 0 0.50385227 |
| Murina_cyclotis          | 0.01530987 | 0 0.50382739 |
| Glossophaga_commissarisi | 0.01528603 | 0 0.50382143 |
| Platyrrhinus_helleri     | 0.01525165 | 0 0.50381284 |
| Scotophilus_leucogaster  | 0.01490418 | 0 0.50372598 |
| Hipposideros_ater        | 0.01454802 | 0 0.50363694 |
| Myotis_macroductylus     | 0.01452717 | 0 0.50363173 |

|                            |            |              |
|----------------------------|------------|--------------|
| Rhinolophus_blasii         | 0.01435204 | 0 0.50358795 |
| Lasiurus_ega               | 0.01427851 | 0 0.50356957 |
| Tadarida_teniotis          | 0.01415396 | 0 0.50353843 |
| Pteropus_howensis          | 0.0141146  | 0 0.50352859 |
| Hipposideros_caffer        | 0.01408971 | 0 0.50352237 |
| Myotis_blythii             | 0.01408741 | 0 0.5035218  |
| Cardioderma_cor            | 0.01406157 | 0 0.50351533 |
| Philetor_brachypterus      | 0.01378766 | 0 0.50344686 |
| Pipistrellus_kuhlii        | 0.01374582 | 0 0.5034364  |
| Lasiurus_blossevillii      | 0.01372205 | 0 0.50343046 |
| Lophostoma_silvicolu       | 0.01354938 | 0 0.50338729 |
| Myotis_siligorensis        | 0.01349915 | 0 0.50337474 |
| Kerivoula_picta            | 0.01343874 | 0 0.50335963 |
| Uroderma_bilobatum         | 0.01340375 | 0 0.50335089 |
| Rhinolophus_madurensis     | 0.01339126 | 0 0.50334776 |
| Rhinolophus_trifoliatu     | 0.01338065 | 0 0.50334511 |
| Tadarida_fulminans         | 0.01335803 | 0 0.50333946 |
| Rhinolophus_beddomei       | 0.01333168 | 0 0.50333287 |
| Rhinolophus_mehelyi        | 0.01331189 | 0 0.50332792 |
| Eidolon_dupreanum          | 0.01331023 | 0 0.50332751 |
| Carollia_brevicauda        | 0.01309859 | 0 0.5032746  |
| Rhinolophus_imaizumii      | 0.01305115 | 0 0.50326274 |
| Pipistrellus_subflavus     | 0.01303183 | 0 0.50325791 |
| Myotis_horsfieldii         | 0.01292253 | 0 0.50323059 |
| Hipposideros_diadema       | 0.01289403 | 0 0.50322346 |
| Nycteris_macrotis          | 0.01288477 | 0 0.50322115 |
| Nycteris_thebaica          | 0.01278111 | 0 0.50319523 |
| Eptesicus_furinalis        | 0.01274565 | 0 0.50318637 |
| Hypsugo_alaschanicus       | 0.01272799 | 0 0.50318196 |
| Myotis_hosonoi             | 0.01272097 | 0 0.5031802  |
| Rhinolophus_canuti         | 0.01267647 | 0 0.50316908 |
| Rhinolophus_philippinensis | 0.0126573  | 0 0.50316428 |
| Murina_grisea              | 0.01252779 | 0 0.50313191 |
| la_io                      | 0.01244721 | 0 0.50311176 |
| Myotis_leibii              | 0.01237505 | 0 0.50309372 |
| Lasionycteris_noctivagans  | 0.01226959 | 0 0.50306736 |
| Thyroptera_tricolor        | 0.01226025 | 0 0.50306503 |
| Rhinolophus_capensis       | 0.01220506 | 0 0.50305123 |
| Hypsugo_imbricatus         | 0.01209846 | 0 0.50302458 |
| Hipposideros_halophyllus   | 0.01206591 | 0 0.50301644 |
| Glossophaga_longirostris   | 0.01200603 | 0 0.50300147 |
| Rhinolophus_formosae       | 0.01197421 | 0 0.50299352 |

|                            |            |              |
|----------------------------|------------|--------------|
| Lasiurus_borealis          | 0.01187645 | 0 0.50296908 |
| Nyctalus_noctula           | 0.0118426  | 0 0.50296062 |
| Hipposideros_larvatus      | 0.01181797 | 0 0.50295446 |
| Rhinolophus_simulator      | 0.01179917 | 0 0.50294976 |
| Eptesicus_dimissus         | 0.01177863 | 0 0.50294462 |
| Pipistrellus_nathusii      | 0.01173536 | 0 0.50293381 |
| Rhinolophus_stheno         | 0.01171921 | 0 0.50292977 |
| Rhinolophus_arcuatus       | 0.01168223 | 0 0.50292052 |
| Rhinopoma_hardwickii       | 0.01156454 | 0 0.5028911  |
| Myotis_oxygnathus          | 0.01149333 | 0 0.5028733  |
| Miniopterus_fraterculus    | 0.01143407 | 0 0.50285849 |
| Falsistrellus_affinis      | 0.01136546 | 0 0.50284133 |
| Myotis_ozensis             | 0.01132656 | 0 0.50283161 |
| Rhinolophus_celebensis     | 0.01132205 | 0 0.50283048 |
| Hipposideros_ruber         | 0.0113203  | 0 0.50283005 |
| Nycteris_grandis           | 0.01129106 | 0 0.50282274 |
| Trachops_cirrhosus         | 0.01127662 | 0 0.50281913 |
| Myotis_pequinius           | 0.01124258 | 0 0.50281062 |
| Sturnira_bidens            | 0.01122435 | 0 0.50280606 |
| Diaemus_youngi             | 0.01120203 | 0 0.50280048 |
| Murina_silvatica           | 0.01116655 | 0 0.50279161 |
| Otomops_formosus           | 0.01108016 | 0 0.50277001 |
| Harpyionycteris_whiteheadi | 0.01105381 | 0 0.50276342 |
| Molossus_rufus             | 0.01104633 | 0 0.50276155 |
| Rhinolophus_rex            | 0.01104457 | 0 0.50276111 |
| Rhinolophus_alcyone        | 0.01103469 | 0 0.50275865 |
| Latidens_salimalii         | 0.01101691 | 0 0.5027542  |
| Scotophilus_dinganii       | 0.01099632 | 0 0.50274905 |
| Macrophyllum_macrophyllum  | 0.01098955 | 0 0.50274736 |
| Myotis_oreias              | 0.01095712 | 0 0.50273925 |
| Hipposideros_cineraceus    | 0.01091533 | 0 0.50272881 |
| Eptesicus_brasiliensis     | 0.01090908 | 0 0.50272724 |
| Pteronotus_parnellii       | 0.0109058  | 0 0.50272642 |
| Histiotus_montanus         | 0.01088504 | 0 0.50272123 |
| Micronycteris_microtis     | 0.01086963 | 0 0.50271738 |
| Rhinolophus_hilli          | 0.01083804 | 0 0.50270948 |
| Pteropus_pselaphon         | 0.01083194 | 0 0.50270796 |
| Carollia_castanea          | 0.01078056 | 0 0.50269511 |
| Pteronotus_personatus      | 0.01076159 | 0 0.50269037 |
| Artibeus_obscurus          | 0.01075713 | 0 0.50268926 |
| Myotis_montivagus          | 0.01073113 | 0 0.50268276 |
| Eptesicus_platyops         | 0.01071016 | 0 0.50267751 |

|                           |            |              |
|---------------------------|------------|--------------|
| Artibeus_toltecus         | 0.01070905 | 0 0.50267724 |
| Rhinophylla_pumilio       | 0.01069055 | 0 0.50267261 |
| Cynopterus_titthaechelus  | 0.01068989 | 0 0.50267245 |
| Myotis_nigricans          | 0.01068254 | 0 0.50267061 |
| Micronycteris_schmidtorum | 0.01067725 | 0 0.50266929 |
| Leptonycteris_yerbabuenae | 0.01067187 | 0 0.50266794 |
| Pteropus_lylei            | 0.01065083 | 0 0.50266268 |
| Hipposideros_galeritus    | 0.01061516 | 0 0.50265376 |
| Stenoderma_rufum          | 0.01060073 | 0 0.50265016 |
| Taphozous_theobaldi       | 0.01058577 | 0 0.50264642 |
| Rhinolophus_keyensis      | 0.01058458 | 0 0.50264612 |
| Myotis_pruinosus          | 0.01055622 | 0 0.50263903 |
| Pipistrellus_endoi        | 0.01055622 | 0 0.50263903 |
| Nyctalus_plancyi          | 0.01055567 | 0 0.50263889 |
| Dobsonia_peronii          | 0.01051748 | 0 0.50262935 |
| Miniopterus_magnater      | 0.01051298 | 0 0.50262822 |
| Scotoecus_pallidus        | 0.01050005 | 0 0.50262499 |
| Pipistrellus_javanicus    | 0.01047876 | 0 0.50261967 |
| Eptesicus_japonensis      | 0.01047648 | 0 0.5026191  |
| Asellia_tridens           | 0.01045785 | 0 0.50261444 |
| Coleura_seychellensis     | 0.01045476 | 0 0.50261367 |
| Lissonycteris_angolensis  | 0.01043108 | 0 0.50260775 |
| Sturnira_ludovici         | 0.01043032 | 0 0.50260756 |
| Tadarida_aegyptiaca       | 0.01041934 | 0 0.50260481 |
| Sturnira_lilium           | 0.01041146 | 0 0.50260284 |
| Barbastella_leucomelas    | 0.01039402 | 0 0.50259848 |
| Chrotopterus_auritus      | 0.0103753  | 0 0.5025938  |
| Molossops_neglectus       | 0.0103749  | 0 0.5025937  |
| Peropteryx_macrotis       | 0.01035586 | 0 0.50258894 |
| Noctilio_albiventris      | 0.01035133 | 0 0.50258781 |
| Nyctalus_aviator          | 0.0103076  | 0 0.50257688 |
| Rhinolophus_mitratus      | 0.01028947 | 0 0.50257235 |
| Myotis_muricola           | 0.01023425 | 0 0.50255854 |
| Kerivoula_hardwickii      | 0.01020295 | 0 0.50255072 |
| Paracoelops_megalotis     | 0.01019933 | 0 0.50254981 |
| Hipposideros_nequam       | 0.01019508 | 0 0.50254875 |
| Pteropus_alecto           | 0.01015762 | 0 0.50253938 |
| Megaerops_kusnotoi        | 0.01013422 | 0 0.50253353 |
| Rhinolophus_euryotis      | 0.01008492 | 0 0.50252121 |
| Rhinolophus_malayanus     | 0.01008488 | 0 0.5025212  |
| Myotis_californicus       | 0.0100612  | 0 0.50251528 |
| Noctilio_leporinus        | 0.01000133 | 0 0.50250031 |

|                        |            |   |            |
|------------------------|------------|---|------------|
| Myotis_ciliolabrum     | 0.01000128 | 0 | 0.5025003  |
| Centurio_senex         | 0.00999907 | 0 | 0.50249975 |
| Syconycteris_australis | 0.00997902 | 0 | 0.50249473 |
| Nycteris_javanica      | 0.00994607 | 0 | 0.5024865  |
| Rhinolophus_subrufus   | 0.00994423 | 0 | 0.50248604 |
| Arielulus_circumdatus  | 0.00993778 | 0 | 0.50248442 |
| Hipposideros_sorenseni | 0.0099293  | 0 | 0.5024823  |
| Hipposideros_madurae   | 0.00990564 | 0 | 0.50247639 |
| Mimon_crenulatum       | 0.00988382 | 0 | 0.50247093 |
| Myotis_alcathoe        | 0.00985678 | 0 | 0.50246417 |
| Scotonycteris_zenkeri  | 0.00984827 | 0 | 0.50246205 |
| Pipistrellus_permixtus | 0.00984281 | 0 | 0.50246068 |
| Lasiurus_egregius      | 0.00983506 | 0 | 0.50245875 |
| Arielulus_torquatus    | 0.00982325 | 0 | 0.50245579 |
| Plecotus_taivanus      | 0.00982325 | 0 | 0.50245579 |
| Murina_puta            | 0.00979324 | 0 | 0.50244829 |
| Myotis_mystacinus      | 0.00978835 | 0 | 0.50244707 |
| Macrotus_californicus  | 0.00977943 | 0 | 0.50244484 |
| Nyctinomops_macrotis   | 0.00974189 | 0 | 0.50243545 |
| Acerodon_jubatus       | 0.00973159 | 0 | 0.50243288 |
| Macroglossus_sobrinus  | 0.00972865 | 0 | 0.50243214 |
| Glischropus_javanus    | 0.00971114 | 0 | 0.50242777 |
| Falsistrellus_mordax   | 0.00971107 | 0 | 0.50242775 |
| Vampyrum_spectrum      | 0.0097031  | 0 | 0.50242576 |
| Mops_mops              | 0.00967439 | 0 | 0.50241858 |
| Eptesicus_serotinus    | 0.00966228 | 0 | 0.50241555 |
| Molossops_temminckii   | 0.00966109 | 0 | 0.50241525 |
| Rhinolophus_osgoodi    | 0.00965761 | 0 | 0.50241438 |
| Carollia_sowellii      | 0.00964262 | 0 | 0.50241064 |
| Tadarida_insignis      | 0.00963952 | 0 | 0.50240986 |
| Myotis_martiniquensis  | 0.00962918 | 0 | 0.50240728 |
| Myotis_riparius        | 0.00956734 | 0 | 0.50239182 |
| Myotis_occultus        | 0.00955507 | 0 | 0.50238875 |
| Myotis_anjouanensis    | 0.00955403 | 0 | 0.50238849 |
| Rhinolophus_rufus      | 0.00951435 | 0 | 0.50237857 |
| Myotis_capaccinii      | 0.00948697 | 0 | 0.50237172 |
| Scotophilus_nigrita    | 0.00948266 | 0 | 0.50237065 |
| Hypsugo_pulveratus     | 0.00948031 | 0 | 0.50237006 |
| Rhinolophus_virgo      | 0.00947308 | 0 | 0.50236825 |
| Thyroptera_discifera   | 0.0094548  | 0 | 0.50236368 |
| Plecotus_austriacus    | 0.009451   | 0 | 0.50236273 |
| Pygoderma_bilabiatum   | 0.00944259 | 0 | 0.50236063 |

|                          |            |              |
|--------------------------|------------|--------------|
| Rhinolophus_fumigatus    | 0.00938236 | 0 0.50234557 |
| Miniopterus_medius       | 0.00932942 | 0 0.50233234 |
| Kerivoula_smithii        | 0.00926937 | 0 0.50231733 |
| Hipposideros_pygmaeus    | 0.00926769 | 0 0.50231691 |
| Hypsugo_cadornae         | 0.0092631  | 0 0.50231576 |
| Megaerops_niphanae       | 0.00924435 | 0 0.50231107 |
| Murina_tenebrosa         | 0.00921938 | 0 0.50230483 |
| Rhinolophus_bocharicus   | 0.00920268 | 0 0.50230065 |
| Pteropus_niger           | 0.00917638 | 0 0.50229408 |
| Pteropus_leucopterus     | 0.00917406 | 0 0.5022935  |
| Hipposideros_hypophyllus | 0.0091658  | 0 0.50229143 |
| Lasiurus_cinereus        | 0.00914147 | 0 0.50228535 |
| Hipposideros_pratti      | 0.00913621 | 0 0.50228404 |
| Vampyroides_caraccioli   | 0.00911796 | 0 0.50227947 |
| Ectophylla_alba          | 0.00906695 | 0 0.50226672 |
| Kerivoula_papillosa      | 0.00906314 | 0 0.50226577 |
| Dobsonia_inermis         | 0.00906231 | 0 0.50226556 |
| Balionycteris_maculata   | 0.00902621 | 0 0.50225654 |
| Harpiocephalus_mordax    | 0.00901665 | 0 0.50225415 |
| Miniopterus_fuscus       | 0.00901412 | 0 0.50225352 |
| Pipistrellus_pygmaeus    | 0.00901095 | 0 0.50225272 |
| Chiroderma_villosum      | 0.00899895 | 0 0.50224972 |
| Glossophaga_leachii      | 0.00899512 | 0 0.50224876 |
| Hesperoptenus_tickelli   | 0.0089832  | 0 0.50224578 |
| Micronycteris_megalotis  | 0.00896624 | 0 0.50224154 |
| Myotis_ater              | 0.00895005 | 0 0.5022375  |
| Hipposideros_orbicularis | 0.00894499 | 0 0.50223623 |
| Rhinolophus_landeri      | 0.00892593 | 0 0.50223147 |
| Pipistrellus_hesperus    | 0.00891684 | 0 0.50222919 |
| Rousettus_obliviosus     | 0.0088905  | 0 0.50222261 |
| Eptesicus_tatei          | 0.00888682 | 0 0.50222169 |
| Saccolaimus_flaviventris | 0.0088223  | 0 0.50220556 |
| Ariteus_flavescens       | 0.0088223  | 0 0.50220556 |
| Miniopterus_tristis      | 0.00880416 | 0 0.50220103 |
| Murina_ryukyuana         | 0.00873852 | 0 0.50218462 |
| Myotis_yanbarensis       | 0.00873852 | 0 0.50218462 |
| Otonycteris_hemprichii   | 0.00872289 | 0 0.50218071 |
| Megaerops_ecaudatus      | 0.00871158 | 0 0.50217788 |
| Rhinolophus_inops        | 0.00869579 | 0 0.50217393 |
| Rhinolophus_yunanensis   | 0.00865406 | 0 0.5021635  |
| Chaerephon_major         | 0.00863046 | 0 0.5021576  |
| Hipposideros_cyclops     | 0.00859675 | 0 0.50214917 |



|                          |            |              |
|--------------------------|------------|--------------|
| Tadarida_ventralis       | 0.00857168 | 0 0.50214291 |
| Hipposideros_fulvus      | 0.00856547 | 0 0.50214135 |
| Barbastella_barbastellus | 0.00854802 | 0 0.50213699 |
| Emballonura_alecto       | 0.00854443 | 0 0.50213609 |
| Emballonura_monticola    | 0.00854375 | 0 0.50213593 |
| Myotis_bechsteinii       | 0.00853286 | 0 0.5021332  |
| Antrozous_pallidus       | 0.00852297 | 0 0.50213073 |
| Triaenops_persicus       | 0.00849794 | 0 0.50212447 |
| Myotis_nattereri         | 0.00847987 | 0 0.50211996 |
| Cynopterus_minutus       | 0.00846364 | 0 0.5021159  |
| Nyctalus_leisleri        | 0.00844755 | 0 0.50211188 |
| Myotis_hasseltii         | 0.00839813 | 0 0.50209952 |
| Lophostoma_carrikeri     | 0.00839548 | 0 0.50209886 |
| Monophyllus_redmani      | 0.00835629 | 0 0.50208906 |
| Pipistrellus_paterculus  | 0.00830966 | 0 0.5020774  |
| Myotis_sicarius          | 0.00830343 | 0 0.50207585 |
| Chiroderma_doriae        | 0.00825781 | 0 0.50206444 |
| Sphaerias_blanfordi      | 0.00822311 | 0 0.50205577 |
| Rhinolophus_megaphyllus  | 0.00821849 | 0 0.50205461 |
| Megaloglossus_woermanni  | 0.00817356 | 0 0.50204338 |
| Scotomanes_ornatus       | 0.00817063 | 0 0.50204265 |
| Leptonycteris_nivalis    | 0.00814699 | 0 0.50203674 |
| Myotis_chinensis         | 0.00812643 | 0 0.5020316  |
| Nyctalus_montanus        | 0.0081158  | 0 0.50202894 |
| Eumops_glaucinus         | 0.00811028 | 0 0.50202756 |
| Hipposideros_lekaguli    | 0.00810513 | 0 0.50202627 |
| Lonchorhina_aurita       | 0.00809454 | 0 0.50202362 |
| Tadarida_latouchei       | 0.00808937 | 0 0.50202233 |
| Hipposideros_jonesi      | 0.00806633 | 0 0.50201657 |
| Diphylla_ecaudata        | 0.00806174 | 0 0.50201543 |
| Myotis_longipes          | 0.0080536  | 0 0.50201339 |
| Myotis_volans            | 0.00801064 | 0 0.50200265 |
| Nyctalus_azoreum         | 0.00800469 | 0 0.50200116 |
| Myotis_bombinus          | 0.00800307 | 0 0.50200076 |
| Myotis_altarium          | 0.00799835 | 0 0.50199958 |
| Pteropus_samoensis       | 0.00799363 | 0 0.5019984  |
| Myotis_dasycneme         | 0.00799293 | 0 0.50199822 |
| Mimon_cozumelae          | 0.0079738  | 0 0.50199344 |
| Anoura_latidens          | 0.0079689  | 0 0.50199221 |
| Natalus_tumidirostris    | 0.00796246 | 0 0.5019906  |
| Cynopterus_horsfieldii   | 0.00794275 | 0 0.50198568 |
| Myotis_macrotarsus       | 0.00794069 | 0 0.50198516 |

|                            |            |              |
|----------------------------|------------|--------------|
| Nyctinomops_aurispinosus   | 0.00791986 | 0 0.50197995 |
| Myotis_brandtii            | 0.00790904 | 0 0.50197725 |
| Pipistrellus_rueppellii    | 0.00790868 | 0 0.50197716 |
| Myotis_welwitschii         | 0.00790603 | 0 0.5019765  |
| Plecotus_teneriffae        | 0.00789681 | 0 0.50197419 |
| Hipposideros_obscurus      | 0.00788041 | 0 0.50197009 |
| Pipistrellus_hesperidus    | 0.00786456 | 0 0.50196613 |
| Pipistrellus_maderensis    | 0.00786189 | 0 0.50196546 |
| Kerivoula_lanosa           | 0.00784567 | 0 0.50196141 |
| Pteronotus_gymnonotus      | 0.00782635 | 0 0.50195658 |
| Mormoops_megalophylla      | 0.00781674 | 0 0.50195418 |
| Myotis_septentrionalis     | 0.0078161  | 0 0.50195401 |
| Balantiopteryx_plicata     | 0.00780846 | 0 0.50195211 |
| Artibeus_watsoni           | 0.0078062  | 0 0.50195154 |
| Nycticeinops_schlieffeni   | 0.00780194 | 0 0.50195048 |
| Pteropus_rufus             | 0.00777721 | 0 0.50194429 |
| Rhinolophus_paradoxolophus | 0.0077755  | 0 0.50194387 |
| Vespertilio_sinensis       | 0.00774955 | 0 0.50193738 |
| Mimon_bennettii            | 0.00771938 | 0 0.50192984 |
| Murina_huttoni             | 0.00771577 | 0 0.50192893 |
| Mops_thersites             | 0.00770663 | 0 0.50192665 |
| Phylloderma_stenops        | 0.00769736 | 0 0.50192433 |
| Emballonura_semicaudata    | 0.00768922 | 0 0.50192229 |
| Leptonycteris_curasoae     | 0.00768572 | 0 0.50192142 |
| Chiroderma_improvisum      | 0.00767918 | 0 0.50191978 |
| Murina_aurata              | 0.00767692 | 0 0.50191922 |
| Dobsonia_minor             | 0.00767507 | 0 0.50191876 |
| Eumops_auripendulus        | 0.0076649  | 0 0.50191622 |
| Rhinolophus_thomasi        | 0.00764228 | 0 0.50191056 |
| Scotophilus_borbonicus     | 0.00763779 | 0 0.50190944 |
| Eonycteris_robusta         | 0.00763574 | 0 0.50190893 |
| Eptesicus_guadeloupensis   | 0.00763135 | 0 0.50190783 |
| Erophylla_bombifrons       | 0.00763047 | 0 0.50190761 |
| Corynorhinus_mexicanus     | 0.00762575 | 0 0.50190643 |
| Phyllostomus_elongatus     | 0.00762091 | 0 0.50190522 |
| Sturnira_erythromos        | 0.00761989 | 0 0.50190496 |
| Glischropus_tylopus        | 0.00761868 | 0 0.50190466 |
| Myotis_keenii              | 0.00761856 | 0 0.50190463 |
| Hipposideros_lylei         | 0.00761651 | 0 0.50190412 |
| Hesperoptenus_blanfordi    | 0.00761393 | 0 0.50190347 |
| Myotis_ikonnikovi          | 0.00761333 | 0 0.50190332 |
| Lasiurus_minor             | 0.00760941 | 0 0.50190234 |

|                           |            |              |
|---------------------------|------------|--------------|
| Natalus_major             | 0.00760941 | 0 0.50190234 |
| Myotis_laniger            | 0.00760225 | 0 0.50190055 |
| Phyllonycteris_aphylla    | 0.00760154 | 0 0.50190038 |
| Taphozous_hamiltoni       | 0.00759096 | 0 0.50189773 |
| Mystacina_robusta         | 0.00758186 | 0 0.50189546 |
| Glauconycteris_variegata  | 0.00757494 | 0 0.50189373 |
| Myotis_bocagii            | 0.00757494 | 0 0.50189373 |
| Aethalops_alecto          | 0.00757468 | 0 0.50189366 |
| Glauconycteris_argentata  | 0.00756424 | 0 0.50189105 |
| Lasiurus_degelidus        | 0.00756087 | 0 0.50189021 |
| Natalus_jamaicensis       | 0.00756069 | 0 0.50189016 |
| Rhinolophus_ruwenzorii    | 0.00755959 | 0 0.50188989 |
| Furipterus_horrens        | 0.00755722 | 0 0.5018893  |
| Tonatia_bidens            | 0.00754592 | 0 0.50188647 |
| Cormura_brevirostris      | 0.0075385  | 0 0.50188462 |
| Rhinolophus_coelophyllus  | 0.00753748 | 0 0.50188436 |
| Sturnira_magna            | 0.00752578 | 0 0.50188144 |
| Cynomops_abrasus          | 0.00752455 | 0 0.50188113 |
| Cynomops_planirostris     | 0.00752054 | 0 0.50188013 |
| Platyrrhinus_infuscus     | 0.00750152 | 0 0.50187537 |
| Eumops_dabbenei           | 0.00749721 | 0 0.50187429 |
| Hipposideros_ridleyi      | 0.00749599 | 0 0.50187399 |
| Mimetillus_moloneyi       | 0.00749362 | 0 0.5018734  |
| Sturnira_luisi            | 0.00748628 | 0 0.50187156 |
| Choeroniscus_minor        | 0.00746712 | 0 0.50186677 |
| Molossus_currentium       | 0.00746672 | 0 0.50186667 |
| Rhinolophus_subbadius     | 0.00746434 | 0 0.50186608 |
| Miniopterus_manavi        | 0.00745642 | 0 0.5018641  |
| Myotis_keaysi             | 0.00745031 | 0 0.50186257 |
| Myotis_oxyotus            | 0.00745031 | 0 0.50186257 |
| Centronycteris_centralis  | 0.00744763 | 0 0.5018619  |
| Chiroderma_salvini        | 0.00744566 | 0 0.50186141 |
| Sturnira_thomasi          | 0.00744293 | 0 0.50186072 |
| Eumops_hansae             | 0.00744062 | 0 0.50186015 |
| Nycteris_gambiensis       | 0.0074361  | 0 0.50185902 |
| Cyttarops_alecto          | 0.0074343  | 0 0.50185857 |
| Glyphonycteris_sylvestris | 0.00743164 | 0 0.5018579  |
| Lichonycteris_obscura     | 0.00743164 | 0 0.5018579  |
| Lionycteris_spurrelli     | 0.00743164 | 0 0.5018579  |
| Trinycteris_nicefori      | 0.00743164 | 0 0.5018579  |
| Lophostoma_brasiliense    | 0.00743164 | 0 0.5018579  |
| Micronycteris_hirsuta     | 0.00743164 | 0 0.5018579  |

|                           |            |              |
|---------------------------|------------|--------------|
| Rhinolophus_hildebrandtii | 0.00742545 | 0 0.50185635 |
| Eptesicus_diminutus       | 0.00742315 | 0 0.50185578 |
| Chiroderma_trinitatum     | 0.00742268 | 0 0.50185566 |
| Enchisthenes_hartii       | 0.00742268 | 0 0.50185566 |
| Uroderma_magnirostrum     | 0.00742268 | 0 0.50185566 |
| Nycteris_hispida          | 0.00741888 | 0 0.50185471 |
| Lonchophylla_thomasi      | 0.00741398 | 0 0.50185349 |
| Laephotis_wintoni         | 0.00741111 | 0 0.50185277 |
| Artibeus_gnomus           | 0.00740592 | 0 0.50185147 |
| Cynomops_paranus          | 0.00740592 | 0 0.50185147 |
| Rhinolophus_creaghi       | 0.0073973  | 0 0.50184932 |
| Tonatia_saurophila        | 0.00739129 | 0 0.50184781 |
| Myotis_simus              | 0.00738937 | 0 0.50184733 |
| Saccopteryx_leptura       | 0.00737372 | 0 0.50184342 |
| Rhogeessa_io              | 0.00737372 | 0 0.50184342 |
| Scotophilus_viridis       | 0.00737002 | 0 0.5018425  |
| Pteronotus_davyi          | 0.00736937 | 0 0.50184233 |
| Lonchophylla_robusta      | 0.00734735 | 0 0.50183683 |
| Glyphonycteris_daviesi    | 0.0073357  | 0 0.50183392 |
| Cynomops_greenhalli       | 0.00732919 | 0 0.50183229 |
| Pipistrellus_nanulus      | 0.00731925 | 0 0.5018298  |
| Pteropus_voeltzkowi       | 0.0073141  | 0 0.50182852 |
| Saccolaimus_peli          | 0.00731261 | 0 0.50182814 |
| Myotis_chiloensis         | 0.00730631 | 0 0.50182657 |
| Rhinolophus_robinsoni     | 0.0072971  | 0 0.50182427 |
| Pipistrellus_deserti      | 0.00729509 | 0 0.50182377 |
| Monophyllus_plethodon     | 0.00729222 | 0 0.50182305 |
| Paranyctimene_raptor      | 0.00728528 | 0 0.50182131 |
| Ardops_nichollsi          | 0.00728124 | 0 0.5018203  |
| Nyctophilus_geoffroyi     | 0.00727713 | 0 0.50181927 |
| Taphozous_mauritanus      | 0.00727658 | 0 0.50181914 |
| Pteropus_seychellensis    | 0.00727578 | 0 0.50181894 |
| Pipistrellus_rusticus     | 0.00726721 | 0 0.50181679 |
| Scotoecus_hirundo         | 0.00726574 | 0 0.50181643 |
| Miniopterus_minor         | 0.00726241 | 0 0.50181559 |
| Scotoecus_albofuscus      | 0.00725876 | 0 0.50181468 |
| Choeroniscus_godmani      | 0.00725523 | 0 0.5018138  |
| Ametrida_centurio         | 0.00725434 | 0 0.50181358 |
| Molossus_pretiosus        | 0.00724685 | 0 0.5018117  |
| Myotis_levis              | 0.0072457  | 0 0.50181142 |
| Pteropus_hypomelanus      | 0.00723858 | 0 0.50180964 |
| Kerivoula_argentata       | 0.007237   | 0 0.50180924 |

|                             |            |              |
|-----------------------------|------------|--------------|
| Hipposideros_lamottei       | 0.00723628 | 0 0.50180906 |
| Rhinolophus_borneensis      | 0.00722855 | 0 0.50180713 |
| Platyrrhinus_brachycephalus | 0.00722681 | 0 0.5018067  |
| Sphaeronycteris_toxophyllum | 0.00722527 | 0 0.50180631 |
| Myotis_ruber                | 0.00722299 | 0 0.50180574 |
| Rhinolophus_cognatus        | 0.00722185 | 0 0.50180545 |
| Otomops_wroughtoni          | 0.00722174 | 0 0.50180543 |
| Artibeus_fimbriatus         | 0.00721761 | 0 0.50180439 |
| Lampronnycteris_brachyotis  | 0.0072168  | 0 0.50180419 |
| Nyctiellus_lepidus          | 0.00720589 | 0 0.50180147 |
| Nycteris_intermedia         | 0.00720441 | 0 0.5018011  |
| Scotophilus_nux             | 0.00719142 | 0 0.50179785 |
| Rhinophylla_fischeriae      | 0.00719034 | 0 0.50179758 |
| Chaerephon_leucogaster      | 0.00718786 | 0 0.50179696 |
| Artibeus_cinereus           | 0.00718426 | 0 0.50179606 |
| Artibeus_glaucus            | 0.00718182 | 0 0.50179545 |
| Nyctimene_rabori            | 0.00717914 | 0 0.50179478 |
| Vespertilio_murinus         | 0.0071489  | 0 0.50178722 |
| Rhinolophus_nereis          | 0.0071434  | 0 0.50178584 |
| Hipposideros_vittatus       | 0.00714228 | 0 0.50178556 |
| Nyctinomops_laticaudatus    | 0.00714047 | 0 0.50178511 |
| Rousettus_spinalatus        | 0.0071334  | 0 0.50178334 |
| Centronycteris_maximiliani  | 0.00712749 | 0 0.50178187 |
| Miniopterus_natalensis      | 0.00712589 | 0 0.50178146 |
| Murina_tubinaris            | 0.00711671 | 0 0.50177917 |
| Craseonycteris_thonglongyai | 0.00710914 | 0 0.50177728 |
| Melonycteris_melanops       | 0.00710327 | 0 0.50177581 |
| Artibeus_concolor           | 0.00709753 | 0 0.50177438 |
| Nyctimene_albiventer        | 0.00709043 | 0 0.5017726  |
| Molossus_coibensis          | 0.00707845 | 0 0.50176961 |
| Artibeus_anderseni          | 0.00707764 | 0 0.5017694  |
| Hipposideros_fuliginosus    | 0.00707678 | 0 0.50176919 |
| Lavia_frons                 | 0.00707427 | 0 0.50176856 |
| Corynorhinus_townsendii     | 0.00704464 | 0 0.50176115 |
| Myotis_rosseti              | 0.00701788 | 0 0.50175446 |
| Glauconycteris_poensis      | 0.00699432 | 0 0.50174857 |
| Myotis_auriculus            | 0.00699362 | 0 0.5017484  |
| Musonycteris_harrisoni      | 0.00698277 | 0 0.50174568 |
| Chalinolobus_tuberculatus   | 0.00697289 | 0 0.50174322 |
| Eptesicus_andinus           | 0.00697271 | 0 0.50174317 |
| Sturnira_oporaphilum        | 0.00696599 | 0 0.50174149 |
| Hipposideros_macrobullatus  | 0.00696245 | 0 0.50174061 |

|                            |            |              |
|----------------------------|------------|--------------|
| Anoura_caudifer            | 0.00694692 | 0 0.50173672 |
| Rhinolophus_swinnyi        | 0.00693828 | 0 0.50173456 |
| Myotis_austroriparius      | 0.00693352 | 0 0.50173337 |
| Carollia_subrufa           | 0.00693291 | 0 0.50173322 |
| Rhinolophus_maclaudi       | 0.00692803 | 0 0.501732   |
| Hipposideros_lankadiva     | 0.00692419 | 0 0.50173104 |
| Choeronycteris_mexicana    | 0.00691084 | 0 0.5017277  |
| Nyctimene_major            | 0.00690723 | 0 0.5017268  |
| Vespadelus_caurinus        | 0.00686781 | 0 0.50171695 |
| Carollia_colombiana        | 0.0068453  | 0 0.50171132 |
| Lasiurus_xanthinus         | 0.00680803 | 0 0.501702   |
| Rhynchonycteris_naso       | 0.00680271 | 0 0.50170067 |
| Epomophorus_minimus        | 0.00680093 | 0 0.50170023 |
| Nyctophilus_arnhemensis    | 0.00676865 | 0 0.50169216 |
| Histiotus_macrotus         | 0.00674809 | 0 0.50168702 |
| Myotis_melanorhinus        | 0.00674741 | 0 0.50168685 |
| Triaenops_furculus         | 0.0067376  | 0 0.50168439 |
| Hipposideros_stenotis      | 0.00670117 | 0 0.50167529 |
| Glauconycteris_beatrix     | 0.00668902 | 0 0.50167225 |
| Hipposideros_beatus        | 0.00668633 | 0 0.50167158 |
| Eumops_underwoodi          | 0.00667676 | 0 0.50166918 |
| Rousettus_madagascariensis | 0.00664068 | 0 0.50166017 |
| Vampyressa_melissa         | 0.00662635 | 0 0.50165658 |
| Phyllostomus_latifolius    | 0.00662184 | 0 0.50165545 |
| Molossops_mattogrossensis  | 0.00662078 | 0 0.50165519 |
| Scotozous_dormeri          | 0.00661921 | 0 0.5016548  |
| Hipposideros_dinops        | 0.00660573 | 0 0.50165143 |
| Nyctophilus_walkerii       | 0.00660566 | 0 0.50165141 |
| Myotis_thysanodes          | 0.00659717 | 0 0.50164929 |
| Artibeus_amplus            | 0.00659126 | 0 0.50164781 |
| Nycteris_nana              | 0.00659042 | 0 0.5016476  |
| Myotis_goudoti             | 0.00658493 | 0 0.50164623 |
| Rousettus_lanosus          | 0.00657885 | 0 0.50164471 |
| Histiotus_velatus          | 0.00657579 | 0 0.50164394 |
| Myotis_yumanensis          | 0.00657304 | 0 0.50164325 |
| Platyrrhinus_vittatus      | 0.00656746 | 0 0.50164186 |
| Hypsugo_eisentrauti        | 0.00656305 | 0 0.50164076 |
| Rhinolophus_hipposideros   | 0.00654708 | 0 0.50163677 |
| Chaerephon_johorensis      | 0.00654686 | 0 0.50163671 |
| Mops_sarasinorum           | 0.0065376  | 0 0.5016344  |
| Rhinolophus_marshalli      | 0.00652732 | 0 0.50163182 |
| Rhinolophus_convexus       | 0.00649844 | 0 0.5016246  |

|                         |            |   |            |
|-------------------------|------------|---|------------|
| Mesophylla_macconnelli  | 0.00649842 | 0 | 0.5016246  |
| Rhinolophus_shameli     | 0.00649568 | 0 | 0.50162392 |
| Hipposideros_inornatus  | 0.0064901  | 0 | 0.50162252 |
| Rhinolophus_silvestris  | 0.00648621 | 0 | 0.50162155 |
| Rhinolophus_sakejiensis | 0.00648454 | 0 | 0.50162113 |
| Kerivoula_phalaena      | 0.00646971 | 0 | 0.50161742 |
| Mops_spurrelli          | 0.00646879 | 0 | 0.50161719 |
| Pteralopex_anceps       | 0.00645493 | 0 | 0.50161373 |
| Hypsugo_macrotis        | 0.00644506 | 0 | 0.50161126 |
| Chalinolobus_gouldii    | 0.00643664 | 0 | 0.50160916 |
| Rhinolophus_deckenii    | 0.0064365  | 0 | 0.50160912 |
| Saccopteryx_canescens   | 0.00643639 | 0 | 0.50160909 |
| Erophylla_sezekorni     | 0.00642611 | 0 | 0.50160652 |
| Aselliscus_stoliczkanus | 0.00642152 | 0 | 0.50160538 |
| Rhinolophus_adami       | 0.00642111 | 0 | 0.50160527 |
| Mops_petersoni          | 0.00641661 | 0 | 0.50160415 |
| Neoromicia_brunneus     | 0.00641661 | 0 | 0.50160415 |
| Acerodon_humilis        | 0.00640486 | 0 | 0.50160121 |
| Myotis_whitleyi         | 0.00640081 | 0 | 0.5016002  |
| Chaerephon_tomensis     | 0.00639999 | 0 | 0.50159999 |
| Rhinolophus_sedulus     | 0.00637323 | 0 | 0.5015933  |
| Rhinolophus_siamensis   | 0.006373   | 0 | 0.50159324 |
| Rhinolophus_ziama       | 0.006373   | 0 | 0.50159324 |
| Taphozous_kapalgensis   | 0.00636654 | 0 | 0.50159163 |
| Peropteryx_leucoptera   | 0.00636164 | 0 | 0.50159041 |
| Haplonycteris_fischeri  | 0.00636121 | 0 | 0.5015903  |
| Nycteris_major          | 0.00636021 | 0 | 0.50159005 |
| Mosia_nigrescens        | 0.00635995 | 0 | 0.50158998 |
| Rhinolophus_denti       | 0.00635643 | 0 | 0.5015891  |
| Rhinolophus_guineensis  | 0.00635216 | 0 | 0.50158804 |
| Rhinolophus_darlingi    | 0.00634012 | 0 | 0.50158503 |
| Rhinolophus_hillorum    | 0.00633611 | 0 | 0.50158402 |
| Myotis_emarginatus      | 0.00632897 | 0 | 0.50158224 |
| Nycteris_aurita         | 0.00632489 | 0 | 0.50158122 |
| Eptesicus_nasutus       | 0.00632326 | 0 | 0.50158081 |
| Platyrrhinus_dorsalis   | 0.00631841 | 0 | 0.5015796  |
| Murina_fusca            | 0.00630922 | 0 | 0.5015773  |
| Myotis_hajastanicus     | 0.00630922 | 0 | 0.5015773  |
| Nyctalus_furvus         | 0.00630922 | 0 | 0.5015773  |
| Chaerephon_solomonis    | 0.00630079 | 0 | 0.50157519 |
| Tadarida_lobata         | 0.0063005  | 0 | 0.50157512 |
| Myotis_moluccarum       | 0.00629446 | 0 | 0.50157361 |

|                           |            |   |            |
|---------------------------|------------|---|------------|
| Pteralopex_atrata         | 0.00629363 | 0 | 0.5015734  |
| Pteropus_mahaganus        | 0.00629363 | 0 | 0.5015734  |
| Sturnira_bogotensis       | 0.00629048 | 0 | 0.50157261 |
| Murina_hilgendorfi        | 0.00628863 | 0 | 0.50157215 |
| Myotis_punicus            | 0.00628863 | 0 | 0.50157215 |
| Melonycteris_woodfordi    | 0.00628749 | 0 | 0.50157187 |
| Myotis_schaubi            | 0.00628401 | 0 | 0.501571   |
| Hipposideros_abae         | 0.00627328 | 0 | 0.50156832 |
| Eptesicus_chiriquinus     | 0.006272   | 0 | 0.50156799 |
| Pteropus_speciosus        | 0.00627016 | 0 | 0.50156754 |
| Eumops_trumbulli          | 0.006257   | 0 | 0.50156424 |
| Glauconycteris_kenyacola  | 0.00625587 | 0 | 0.50156396 |
| Rhinolophus_montanus      | 0.00625383 | 0 | 0.50156345 |
| Kerivoula_pellucida       | 0.00625323 | 0 | 0.5015633  |
| Pteralopex_acrodonta      | 0.00625048 | 0 | 0.50156261 |
| Micronycteris_brosseti    | 0.00624432 | 0 | 0.50156108 |
| Pteropus_yapensis         | 0.00624396 | 0 | 0.50156099 |
| Neoromicia_nanus          | 0.00624256 | 0 | 0.50156063 |
| Anoura_geoffroyi          | 0.006238   | 0 | 0.5015595  |
| Myotis_csorbai            | 0.00622281 | 0 | 0.5015557  |
| Arielulus_cuprosus        | 0.00621565 | 0 | 0.50155391 |
| Neoromicia_rendalli       | 0.00620488 | 0 | 0.50155122 |
| Hipposideros_cervinus     | 0.00618993 | 0 | 0.50154748 |
| Pteropus_neohipernicus    | 0.00618555 | 0 | 0.50154638 |
| Myonycteris_brachycephala | 0.00617607 | 0 | 0.50154401 |
| Nycticeius_humeralis      | 0.00616959 | 0 | 0.50154239 |
| Myotis_daubentonii        | 0.00616921 | 0 | 0.5015423  |
| Nycteris_tragata          | 0.00615396 | 0 | 0.50153849 |
| Cheiromeles_torquatus     | 0.00613231 | 0 | 0.50153307 |
| Ptenochirus_minor         | 0.00613195 | 0 | 0.50153298 |
| Artibeus_inopinatus       | 0.00610681 | 0 | 0.5015267  |
| Vespadelus_douglasorum    | 0.00610642 | 0 | 0.5015266  |
| Hipposideros_coronatus    | 0.00609962 | 0 | 0.5015249  |
| Myonycteris_relicta       | 0.00609467 | 0 | 0.50152366 |
| Hipposideros_durgadasi    | 0.00607333 | 0 | 0.50151833 |
| Anthops_ornatus           | 0.00607308 | 0 | 0.50151827 |
| Eptesicus_floweri         | 0.00607187 | 0 | 0.50151796 |
| Acerodon_celebensis       | 0.00605757 | 0 | 0.50151439 |
| Dobsonia_exoleta          | 0.00605757 | 0 | 0.50151439 |
| Tadarida_australis        | 0.00602989 | 0 | 0.50150747 |
| Pteropus_lombocensis      | 0.00602453 | 0 | 0.50150613 |
| Mormoops_blainvillei      | 0.00602397 | 0 | 0.50150599 |



|                           |            |              |
|---------------------------|------------|--------------|
| Nyctophilus_gouldi        | 0.00601622 | 0 0.50150405 |
| Molossus_aztecus          | 0.00600514 | 0 0.50150128 |
| Hipposideros_megalotis    | 0.00600284 | 0 0.50150071 |
| Chilonatalus_micropus     | 0.00599833 | 0 0.50149958 |
| Pteronotus_macleayii      | 0.00599833 | 0 0.50149958 |
| Myotis_annectans          | 0.00599047 | 0 0.50149761 |
| Glossophaga_morenoi       | 0.00599026 | 0 0.50149756 |
| Pipistrellus_stenopterus  | 0.00596897 | 0 0.50149224 |
| Chaerephon_ansorgei       | 0.00596838 | 0 0.50149209 |
| Peropteryx_trinitatis     | 0.00596446 | 0 0.50149111 |
| Hipposideros_sumbae       | 0.00596355 | 0 0.50149088 |
| Pteropus_pilosus          | 0.00596307 | 0 0.50149076 |
| Pteropus_subniger         | 0.00596307 | 0 0.50149076 |
| Alionycteris_paucidentata | 0.00596104 | 0 0.50149026 |
| Pteropus_cognatus         | 0.00595163 | 0 0.5014879  |
| Cheiromeles_parvidens     | 0.00594876 | 0 0.50148719 |
| Hipposideros_curtus       | 0.00594837 | 0 0.50148709 |
| Phyllonycteris_poeyi      | 0.00594463 | 0 0.50148615 |
| Myotis_scotti             | 0.00594197 | 0 0.50148549 |
| Rhogeessa_alleni          | 0.00594197 | 0 0.50148549 |
| Triaenops_auritus         | 0.00593875 | 0 0.50148468 |
| Taphozous_georgianus      | 0.00593702 | 0 0.50148425 |
| Hipposideros_edwardshilli | 0.00593408 | 0 0.50148352 |
| Mormopterus_doriae        | 0.0059331  | 0 0.50148327 |
| Lasiurus_pfeifferi        | 0.00592899 | 0 0.50148224 |
| Nycticeius_cubanus        | 0.00592899 | 0 0.50148224 |
| Lasiurus_insularis        | 0.00592899 | 0 0.50148224 |
| Kerivoula_minuta          | 0.00592554 | 0 0.50148138 |
| Phoniscus_atrox           | 0.00592554 | 0 0.50148138 |
| Pteronotus_quadridens     | 0.00592165 | 0 0.50148041 |
| Macrotus_waterhousii      | 0.00591955 | 0 0.50147988 |
| Kerivoula_whiteheadi      | 0.00591741 | 0 0.50147935 |
| Eptesicus_nilssonii       | 0.00591604 | 0 0.50147901 |
| Mormopterus_minutus       | 0.00591338 | 0 0.50147834 |
| Phyllops_falcatus         | 0.00591338 | 0 0.50147834 |
| Nyctophilus_bifax         | 0.0059119  | 0 0.50147797 |
| Myotis_iesoensis          | 0.00591023 | 0 0.50147755 |
| Kerivoula_flora           | 0.0059062  | 0 0.50147655 |
| Murina_suilla             | 0.0059062  | 0 0.50147655 |
| Sturnira_mistratensis     | 0.0059036  | 0 0.50147589 |
| Chironax_melanocephalus   | 0.0059035  | 0 0.50147587 |
| Hypsugo_bodenheimeri      | 0.00590144 | 0 0.50147536 |

|                          |            |              |
|--------------------------|------------|--------------|
| Hipposideros_thomensis   | 0.00588864 | 0 0.50147216 |
| Chaerephon_bivittatus    | 0.00587981 | 0 0.50146995 |
| Saccopteryx_bilineata    | 0.00587381 | 0 0.50146845 |
| Myotis_abei              | 0.00587204 | 0 0.50146801 |
| Neoromicia_tenuipinnis   | 0.00586778 | 0 0.50146694 |
| Cynopterus_luzoniensis   | 0.0058645  | 0 0.50146612 |
| Scotophilus_celebensis   | 0.0058645  | 0 0.50146612 |
| Pteropus_griseus         | 0.0058645  | 0 0.50146612 |
| Pipistrellus_adamsi      | 0.00586322 | 0 0.5014658  |
| Pipistrellus_westralis   | 0.00586322 | 0 0.5014658  |
| Pipistrellus_aero        | 0.00585816 | 0 0.50146454 |
| Mormopterus_acetabulosus | 0.00585816 | 0 0.50146454 |
| Cynopterus_nusatenggara  | 0.00584995 | 0 0.50146248 |
| Clootis_percivali        | 0.00584051 | 0 0.50146012 |
| Euderma_maculatum        | 0.00583579 | 0 0.50145894 |
| Pipistrellus_minahassae  | 0.00583455 | 0 0.50145863 |
| Murina_rozendaali        | 0.00582997 | 0 0.50145749 |
| Myotis_hermani           | 0.00582892 | 0 0.50145723 |
| Otomops_johnstonei       | 0.00582562 | 0 0.5014564  |
| Pteralopex_taki          | 0.00582562 | 0 0.5014564  |
| Pteropus_aruensis        | 0.00582562 | 0 0.5014564  |
| Pteropus_keyensis        | 0.00582562 | 0 0.5014564  |
| Nyctimene_keasti         | 0.00582562 | 0 0.5014564  |
| Myotis_dominicensis      | 0.00582461 | 0 0.50145615 |
| Hypsugo_ariel            | 0.00581743 | 0 0.50145435 |
| Epomophorus_minor        | 0.00581699 | 0 0.50145424 |
| Pteropus_brunneus        | 0.00581233 | 0 0.50145308 |
| Pteropus_tokudae         | 0.00581233 | 0 0.50145308 |
| Pteropus_pohlei          | 0.00580042 | 0 0.5014501  |
| Nyctimene_aello          | 0.00578744 | 0 0.50144686 |
| Nyctimene_cephalotes     | 0.00578744 | 0 0.50144686 |
| Nyctimene_vizcaccia      | 0.00578595 | 0 0.50144648 |
| Pteropus_gilliardorum    | 0.00578595 | 0 0.50144648 |
| Neoromicia_helios        | 0.00578123 | 0 0.5014453  |
| Rhinopoma_muscatellum    | 0.00577744 | 0 0.50144436 |
| Nyctophilus_heran        | 0.00577647 | 0 0.50144411 |
| Micronycteris_minuta     | 0.00576664 | 0 0.50144166 |
| Neoromicia_guineensis    | 0.0057549  | 0 0.50143872 |
| Mops_trevori             | 0.00575077 | 0 0.50143769 |
| Lasiurus_castaneus       | 0.00575014 | 0 0.50143753 |
| Taphozous_hildegardeae   | 0.00574924 | 0 0.50143731 |
| Dobsonia_chapmani        | 0.00572797 | 0 0.50143199 |

|                             |            |              |
|-----------------------------|------------|--------------|
| Chaerephon_aloysiisabaudiae | 0.00572544 | 0 0.50143136 |
| Chaerephon_jobensis         | 0.00572235 | 0 0.50143059 |
| Mops_niagarae               | 0.00569134 | 0 0.50142283 |
| Hipposideros_inexpectatus   | 0.00568073 | 0 0.50142018 |
| Mops_niveiventer            | 0.00567805 | 0 0.50141951 |
| Chaerephon_bemmeleni        | 0.00567203 | 0 0.50141801 |
| Neoromicia_zuluensis        | 0.00566242 | 0 0.5014156  |
| Mops_leucostigma            | 0.00565197 | 0 0.50141299 |
| Myotis_nesopolus            | 0.00565122 | 0 0.5014128  |
| Hypsugo_arabicus            | 0.00564991 | 0 0.50141247 |
| Myotis_vivesi               | 0.00562538 | 0 0.50140634 |
| Neoromicia_somalicus        | 0.00562054 | 0 0.50140513 |
| Vampyressa_bidens           | 0.00561326 | 0 0.50140331 |
| Chaerephon_nigeriae         | 0.00560387 | 0 0.50140097 |
| Neoromicia_melckorum        | 0.00559569 | 0 0.50139892 |
| Scotoecus_hindei            | 0.00559404 | 0 0.50139851 |
| Scotophilus_robustus        | 0.00558753 | 0 0.50139688 |
| Hipposideros_camerunensis   | 0.00558199 | 0 0.50139549 |
| Neoromicia_flavescens       | 0.00558069 | 0 0.50139517 |
| Scotoecus_albigula          | 0.00558069 | 0 0.50139517 |
| Promops_nasutus             | 0.00558052 | 0 0.50139513 |
| Otopteropus_cartilagonodus  | 0.00557931 | 0 0.50139483 |
| Pteropus_intermedius        | 0.00557598 | 0 0.50139399 |
| Hypsugo_crassulus           | 0.0055738  | 0 0.50139345 |
| Eptesicus_bottae            | 0.00557217 | 0 0.50139304 |
| Myotis_fortidens            | 0.00556974 | 0 0.50139243 |
| Rhogeessa_parvula           | 0.00556974 | 0 0.50139243 |
| Rhinopoma_macinnesi         | 0.00556965 | 0 0.50139241 |
| Chaerephon_shortridgei      | 0.00555631 | 0 0.50138908 |
| Hypsugo_anchietae           | 0.00555631 | 0 0.50138908 |
| Chaerephon_russatus         | 0.00555328 | 0 0.50138832 |
| Mops_brachypterus           | 0.00555325 | 0 0.50138831 |
| Scotorepens_balstoni        | 0.005549   | 0 0.50138725 |
| Hypsugo_lophurus            | 0.00554772 | 0 0.50138693 |
| Artibeus_hirsutus           | 0.0055466  | 0 0.50138665 |
| Acerodon_leucotis           | 0.00554018 | 0 0.50138504 |
| Mops_demonstrator           | 0.00554014 | 0 0.50138503 |
| Eptesicus_bobrinskoi        | 0.00554009 | 0 0.50138502 |
| Hypsugo_anthonyi            | 0.00553695 | 0 0.50138423 |
| Hypsugo_joffrei             | 0.00553695 | 0 0.50138423 |
| Miniopterus_africanus       | 0.00553082 | 0 0.5013827  |
| Mystacina_tuberculata       | 0.00552864 | 0 0.50138216 |

|                             |            |   |            |
|-----------------------------|------------|---|------------|
| Eumops_bonariensis          | 0.00552643 | 0 | 0.5013816  |
| Nyctimene_robinsoni         | 0.00552623 | 0 | 0.50138155 |
| Hypsugo_vordermanni         | 0.00551539 | 0 | 0.50137884 |
| Taphozous_troughtoni        | 0.00551531 | 0 | 0.50137882 |
| Saccolaimus_mixtus          | 0.00551528 | 0 | 0.50137882 |
| Eptesicus_gobiensis         | 0.00550973 | 0 | 0.50137743 |
| Micronycteris_homezi        | 0.00550419 | 0 | 0.50137605 |
| Epomophorus_angolensis      | 0.00550211 | 0 | 0.50137552 |
| Chaerephon_bregullae        | 0.0055017  | 0 | 0.50137542 |
| Hypsugo_kitcheneri          | 0.00550101 | 0 | 0.50137525 |
| Dyacopterus_brooksi         | 0.00549356 | 0 | 0.50137339 |
| Neopteryx_frosti            | 0.00549353 | 0 | 0.50137338 |
| Dobsonia_pannietensis       | 0.00548992 | 0 | 0.50137248 |
| Chaerephon_gallagheri       | 0.00548985 | 0 | 0.50137246 |
| Murina_ussuriensis          | 0.0054877  | 0 | 0.50137192 |
| Chaerephon_chapini          | 0.00547677 | 0 | 0.50136919 |
| Hypsugo_musciculus          | 0.00547671 | 0 | 0.50136917 |
| Otomops_secundus            | 0.00547559 | 0 | 0.50136889 |
| Natalus_stramineus          | 0.00547258 | 0 | 0.50136814 |
| Murina_florium              | 0.00546662 | 0 | 0.50136665 |
| Pteropus_faunulus           | 0.00546598 | 0 | 0.50136649 |
| Micropteropus_intermedius   | 0.00546251 | 0 | 0.50136563 |
| Pteropus_molossinus         | 0.00545525 | 0 | 0.50136381 |
| Pteropus_pelewensis         | 0.00544236 | 0 | 0.50136059 |
| Sturnira_tildae             | 0.0054369  | 0 | 0.50135922 |
| Diclidurus_albus            | 0.00543364 | 0 | 0.50135841 |
| Mops_congicus               | 0.00543337 | 0 | 0.50135834 |
| Bauerus_dubiaquercus        | 0.00542666 | 0 | 0.50135666 |
| Pteropus_insularis          | 0.00542523 | 0 | 0.5013563  |
| Hipposideros_maggietaylorae | 0.00542362 | 0 | 0.5013559  |
| Pteropus_banakrisi          | 0.00542154 | 0 | 0.50135538 |
| Hipposideros_corynophyllus  | 0.00541851 | 0 | 0.50135463 |
| Hipposideros_papua          | 0.00541551 | 0 | 0.50135387 |
| Nyctimene_sanctacruis       | 0.00541104 | 0 | 0.50135276 |
| Pteropus_tuberculatus       | 0.00541104 | 0 | 0.50135276 |
| Vampyressa_pusilla          | 0.00540111 | 0 | 0.50135027 |
| Pteropus_mariannus          | 0.00539154 | 0 | 0.50134788 |
| Chalinolobus_dwyeri         | 0.00539048 | 0 | 0.50134762 |
| Nycteris_madagascariensis   | 0.0053848  | 0 | 0.5013462  |
| Falsistrellus_tasmaniensis  | 0.00537066 | 0 | 0.50134266 |
| Rousettus_bidens            | 0.00537019 | 0 | 0.50134255 |
| Artibeus_fraterculus        | 0.0053568  | 0 | 0.5013392  |

|                            |            |              |
|----------------------------|------------|--------------|
| Hipposideros_coxi          | 0.00535626 | 0 0.50133906 |
| Nycteris_arge              | 0.00535535 | 0 0.50133883 |
| Aselliscus_tricuspidatus   | 0.0053508  | 0 0.5013377  |
| Hipposideros_doriae        | 0.0053508  | 0 0.5013377  |
| Lasiurus_seminolus         | 0.00534834 | 0 0.50133708 |
| Hipposideros_crumeniferus  | 0.00534297 | 0 0.50133574 |
| Hipposideros_calcaratus    | 0.00533877 | 0 0.50133469 |
| Diclidurus_ingens          | 0.00533851 | 0 0.50133462 |
| Megaerops_wetmorei         | 0.00533797 | 0 0.50133449 |
| Anoura_cultrata            | 0.00533635 | 0 0.50133408 |
| Hipposideros_scutinares    | 0.00533571 | 0 0.50133393 |
| Diclidurus_scutatus        | 0.00533348 | 0 0.50133337 |
| Acerodon_mackloti          | 0.00533321 | 0 0.5013333  |
| Epomophorus_grandis        | 0.0053327  | 0 0.50133317 |
| Coelops_robinsoni          | 0.0053248  | 0 0.5013312  |
| Taphozous_hilli            | 0.00532397 | 0 0.50133099 |
| Hipposideros_grandis       | 0.00532095 | 0 0.50133024 |
| Eptesicus_hottentotus      | 0.00531896 | 0 0.50132974 |
| Saccolpteryx_antioquensis  | 0.00531564 | 0 0.50132891 |
| Dobsonia_anderseni         | 0.00531389 | 0 0.50132847 |
| Dyacopterus_spadiceus      | 0.00531271 | 0 0.50132817 |
| Promops_centralis          | 0.00531163 | 0 0.50132791 |
| Diclidurus_isabellus       | 0.005309   | 0 0.50132725 |
| Lonchorhina_marinkellei    | 0.00530758 | 0 0.50132689 |
| Styloctenium_wallacei      | 0.00530714 | 0 0.50132678 |
| Thoopterus_nigrescens      | 0.00530714 | 0 0.50132678 |
| Harpyionycteris_celebensis | 0.00530714 | 0 0.50132678 |
| Rhogeessa_tumida           | 0.00530656 | 0 0.50132664 |
| Hipposideros_rotalis       | 0.00530357 | 0 0.50132589 |
| Pteropus_ualanus           | 0.00530282 | 0 0.5013257  |
| Asellia_patrizii           | 0.00530229 | 0 0.50132557 |
| Epomops_dobsonii           | 0.00529954 | 0 0.50132488 |
| Aethalops_aequalis         | 0.005297   | 0 0.50132425 |
| Arielulus_societatis       | 0.005297   | 0 0.50132425 |
| Dobsonia_viridis           | 0.00529653 | 0 0.50132413 |
| Penthetor_lucasi           | 0.00529635 | 0 0.50132408 |
| Scoteanax_rueppellii       | 0.00529455 | 0 0.50132363 |
| Hipposideros_semoni        | 0.00529361 | 0 0.5013234  |
| Nyctimene_cyclotis         | 0.00529154 | 0 0.50132288 |
| Platyrrhinus_aurarius      | 0.00529154 | 0 0.50132288 |
| Nyctimene_certans          | 0.0052898  | 0 0.50132245 |
| Nyctimene_draconilla       | 0.00528464 | 0 0.50132116 |

|                          |            |              |
|--------------------------|------------|--------------|
| Hipposideros_dyacorum    | 0.0052817  | 0 0.50132042 |
| Mormopterus_beccarii     | 0.00527902 | 0 0.50131975 |
| Notopterus_macdonaldi    | 0.00527817 | 0 0.50131954 |
| Nyctimene_masalai        | 0.00527817 | 0 0.50131954 |
| Pteropus_anetianus       | 0.00527817 | 0 0.50131954 |
| Vespadelus_darlingtoni   | 0.00527424 | 0 0.50131856 |
| Rousettus_celebensis     | 0.00527303 | 0 0.50131826 |
| Eptesicus_kobayashii     | 0.00527262 | 0 0.50131815 |
| Myopterus_daubentonii    | 0.00527235 | 0 0.50131808 |
| Nyctimene_malaitensis    | 0.00527146 | 0 0.50131786 |
| Pteropus_ocularis        | 0.00527146 | 0 0.50131786 |
| Pteropus_vetulus         | 0.00527146 | 0 0.50131786 |
| Pteropus_woodfordi       | 0.00527146 | 0 0.50131786 |
| Pteropus_melanopogon     | 0.00527146 | 0 0.50131786 |
| Plecotus_auritus         | 0.00526369 | 0 0.50131592 |
| Nycteris_vinsoni         | 0.00526235 | 0 0.50131558 |
| Plerotes_anchietae       | 0.00526235 | 0 0.50131558 |
| Syconycteris_carolinae   | 0.00526074 | 0 0.50131518 |
| Emballonura_atrata       | 0.00525938 | 0 0.50131484 |
| Chalinolobus_morio       | 0.00525674 | 0 0.50131418 |
| Myotis_evotis            | 0.00525574 | 0 0.50131393 |
| Dobsonia_crenulata       | 0.00525424 | 0 0.50131356 |
| Dobsonia_emersa          | 0.00525424 | 0 0.50131356 |
| Pteropus_caniceps        | 0.00525424 | 0 0.50131356 |
| Pteropus_chrysoproctus   | 0.00525424 | 0 0.50131356 |
| Pteropus_personatus      | 0.00525424 | 0 0.50131356 |
| Nyctimene_minutus        | 0.00525417 | 0 0.50131354 |
| Nyctinomops_femorosaccus | 0.00525268 | 0 0.50131317 |
| Kerivoula_intermedia     | 0.00525195 | 0 0.50131298 |
| Lonchorhina_fernandezi   | 0.00525195 | 0 0.50131298 |
| Hipposideros_marisae     | 0.00525153 | 0 0.50131288 |
| Hipposideros_wollastoni  | 0.00524934 | 0 0.50131233 |
| Pteropus_macrotis        | 0.00524613 | 0 0.50131153 |
| Myotis_davidii           | 0.00524467 | 0 0.50131117 |
| Histiotus_humboldti      | 0.00524467 | 0 0.50131117 |
| Kerivoula_lenis          | 0.00524467 | 0 0.50131117 |
| Lasiurus_salinae         | 0.00524467 | 0 0.50131117 |
| Lasiurus_varius          | 0.00524467 | 0 0.50131117 |
| Myotis_bucharensis       | 0.00524467 | 0 0.50131117 |
| Myotis_nipalensis        | 0.00524467 | 0 0.50131117 |
| Nycticeius_aenobarbus    | 0.00524467 | 0 0.50131117 |
| Nyctophilus_howensis     | 0.00524467 | 0 0.50131117 |

|                           |            |              |
|---------------------------|------------|--------------|
| Paranyctimene_tenax       | 0.00524467 | 0 0.50131117 |
| Phyllonycteris_major      | 0.00524467 | 0 0.50131117 |
| Plecotus_alpinus          | 0.00524467 | 0 0.50131117 |
| Plecotus_kolombatovici    | 0.00524467 | 0 0.50131117 |
| Plecotus_sardus           | 0.00524467 | 0 0.50131117 |
| Rousettus_linduensis      | 0.00524467 | 0 0.50131117 |
| Scotophilus_collinus      | 0.00524467 | 0 0.50131117 |
| Lasiurus_atratus          | 0.00524467 | 0 0.50131117 |
| Miniopterus_shortridgei   | 0.00524467 | 0 0.50131117 |
| Mormoops_magna            | 0.00524467 | 0 0.50131117 |
| Pteronotus_pristinus      | 0.00524467 | 0 0.50131117 |
| Pteropus_loochoensis      | 0.00524467 | 0 0.50131117 |
| Eptesicus_pachyotis       | 0.00524386 | 0 0.50131096 |
| Eptesicus_matroka         | 0.00524198 | 0 0.50131049 |
| Hesperoptenus_tomesi      | 0.00523701 | 0 0.50130925 |
| Otomops_papuensis         | 0.00523701 | 0 0.50130925 |
| Eumops_maurus             | 0.00523701 | 0 0.50130925 |
| Kerivoula_africana        | 0.00523285 | 0 0.50130821 |
| Miniopterus_paululus      | 0.00523285 | 0 0.50130821 |
| Myotis_australis          | 0.00523285 | 0 0.50130821 |
| Phoniscus_aerosa          | 0.00523285 | 0 0.50130821 |
| Pipistrellus_sturdeeii    | 0.00523285 | 0 0.50130821 |
| Myotis_elegans            | 0.00523135 | 0 0.50130784 |
| Syconycteris_hobbit       | 0.00522919 | 0 0.5013073  |
| Chilonatalus_tumidifrons  | 0.00522689 | 0 0.50130672 |
| Hipposideros_pelingensis  | 0.0052247  | 0 0.50130617 |
| Hipposideros_demissus     | 0.0052247  | 0 0.50130617 |
| Sturnira_mordax           | 0.00522282 | 0 0.5013057  |
| Histiotus_alienus         | 0.00521984 | 0 0.50130496 |
| Plecotus_balensis         | 0.00521953 | 0 0.50130488 |
| Hipposideros_breviceps    | 0.00521941 | 0 0.50130485 |
| Rhogeessa_mira            | 0.00521828 | 0 0.50130457 |
| Vampyressa_nymphaea       | 0.00521756 | 0 0.50130439 |
| Cynomops_mexicanus        | 0.00521497 | 0 0.50130374 |
| Lonchophylla_mordax       | 0.00521367 | 0 0.50130342 |
| Mormopterus_jugularis     | 0.00521087 | 0 0.50130271 |
| Chalinolobus_nigrogriseus | 0.00521053 | 0 0.50130263 |
| Hipposideros_muscinus     | 0.00520684 | 0 0.50130171 |
| Molossops_aequatorianus   | 0.00520609 | 0 0.50130152 |
| Eudiscopus_denticulus     | 0.00520578 | 0 0.50130144 |
| Kerivoula_eriophora       | 0.00520578 | 0 0.50130144 |
| Myotis_morrisi            | 0.00520578 | 0 0.50130144 |

|                          |            |              |
|--------------------------|------------|--------------|
| Sauromys_petrophilus     | 0.0052042  | 0 0.50130105 |
| Arielulus_aureocollaris  | 0.00520248 | 0 0.50130062 |
| Pteropus_fundatus        | 0.00520132 | 0 0.50130033 |
| Pteropus_nitendiensis    | 0.00520132 | 0 0.50130033 |
| Myotis_grisescens        | 0.00520048 | 0 0.50130012 |
| Scotorepens_greyii       | 0.00519809 | 0 0.50129952 |
| Laephotis_botswanae      | 0.00519809 | 0 0.50129952 |
| Myotis_annamiticus       | 0.0051944  | 0 0.5012986  |
| Natalus_primus           | 0.0051944  | 0 0.5012986  |
| Anoura_luismanueli       | 0.0051944  | 0 0.5012986  |
| Platalina_genovensium    | 0.00519387 | 0 0.50129846 |
| Rhogeessa_gracilis       | 0.00518884 | 0 0.50129721 |
| Myotis_planiceps         | 0.00518878 | 0 0.50129719 |
| Pteropus_aldabrensis     | 0.00518867 | 0 0.50129717 |
| Scotorepens_sanborni     | 0.00518661 | 0 0.50129665 |
| Miniopterus_majori       | 0.00518102 | 0 0.50129525 |
| Saccolaryx_gymnura       | 0.00518102 | 0 0.50129525 |
| Mormopterus_loriae       | 0.00518081 | 0 0.5012952  |
| Myotis_cobanensis        | 0.00518071 | 0 0.50129518 |
| Rhogeessa_genowaysi      | 0.00518071 | 0 0.50129518 |
| Myotis_ridleyi           | 0.00517442 | 0 0.5012936  |
| Rhogeessa_minutilla      | 0.00517442 | 0 0.5012936  |
| Emballonura_beccarii     | 0.00517442 | 0 0.5012936  |
| Emballonura_raffrayana   | 0.00517442 | 0 0.5012936  |
| Kerivoula_muscina        | 0.00517442 | 0 0.5012936  |
| Mormopterus_norfolkensis | 0.00517423 | 0 0.50129355 |
| Nycteris_woodi           | 0.00517423 | 0 0.50129355 |
| Phoniscus_papuensis      | 0.00517423 | 0 0.50129355 |
| Eumops_patagonicus       | 0.00516959 | 0 0.50129239 |
| Vespadelus_finlaysoni    | 0.00516959 | 0 0.50129239 |
| Glauconycteris_humeralis | 0.00516863 | 0 0.50129216 |
| Pipistrellus_angulatus   | 0.00516863 | 0 0.50129216 |
| Scotorepens_orion        | 0.00516844 | 0 0.50129211 |
| Platymops_setiger        | 0.00516834 | 0 0.50129208 |
| Myotis_stalkeri          | 0.00516787 | 0 0.50129197 |
| Myotis_peninsularis      | 0.00516785 | 0 0.50129196 |
| Molossus_barnesi         | 0.00516761 | 0 0.5012919  |
| Rhogeessa_aeneus         | 0.00516503 | 0 0.50129126 |
| Falsistrellus_mackenziei | 0.00516199 | 0 0.5012905  |
| Myotis_frater            | 0.0051617  | 0 0.50129042 |
| Platyrrhinus_umbratus    | 0.00516078 | 0 0.50129019 |
| Scleronycteris_ega       | 0.00516078 | 0 0.50129019 |



|                          |            |              |
|--------------------------|------------|--------------|
| Vampyressa_brocki        | 0.00516078 | 0 0.50129019 |
| Lasiurus_ebenus          | 0.00515988 | 0 0.50128997 |
| Tadarida_kuboriensis     | 0.00515906 | 0 0.50128976 |
| Nycteris_parisii         | 0.00515821 | 0 0.50128955 |
| Otomops_madagascariensis | 0.00515821 | 0 0.50128955 |
| Taphozous_australis      | 0.00515821 | 0 0.50128955 |
| Platyrrhinus_recifinus   | 0.00515597 | 0 0.50128899 |
| Vespadelus_baverstocki   | 0.00515597 | 0 0.50128899 |
| Mops_nanulus             | 0.00515524 | 0 0.50128881 |
| Lophostoma_schulzi       | 0.00515515 | 0 0.50128879 |
| Miniopterus_macrocneme   | 0.00514928 | 0 0.50128732 |
| Murina_aenea             | 0.00514928 | 0 0.50128732 |
| Nyctophilus_microtis     | 0.00514928 | 0 0.50128732 |
| Balantiopteryx_infusca   | 0.00514912 | 0 0.50128728 |
| Lonchophylla_bokermanni  | 0.00514894 | 0 0.50128723 |
| Glauconycteris_machadoi  | 0.00514586 | 0 0.50128646 |
| Histiotus_laephotis      | 0.00514586 | 0 0.50128646 |
| Histiotus_magellanicus   | 0.00514586 | 0 0.50128646 |
| Mimon_koepckeae          | 0.00514586 | 0 0.50128646 |
| Myotis_atacamensis       | 0.00514586 | 0 0.50128646 |
| Vespadelus_troughtoni    | 0.00514586 | 0 0.50128646 |
| Myotis_macropus          | 0.00514586 | 0 0.50128646 |
| Scotophilus_nucella      | 0.00514469 | 0 0.50128617 |
| Pipistrellus_collinus    | 0.00514352 | 0 0.50128588 |
| Pteralopex_pulchra       | 0.00514118 | 0 0.50128529 |
| Miniopterus_gleni        | 0.00513786 | 0 0.50128446 |
| Lonchorhina_orinocensis  | 0.00513701 | 0 0.50128425 |
| Glauconycteris_gleni     | 0.00513698 | 0 0.50128424 |
| Chalinolobus_picatus     | 0.0051323  | 0 0.50128307 |
| Cistugo_lesueuri         | 0.0051323  | 0 0.50128307 |
| Cistugo_seabrae          | 0.0051323  | 0 0.50128307 |
| Eptesicus_innoxius       | 0.0051323  | 0 0.50128307 |
| Laephotis_angolensis     | 0.0051323  | 0 0.50128307 |
| Laephotis_namibensis     | 0.0051323  | 0 0.50128307 |
| Mormopterus_kalinowskii  | 0.0051323  | 0 0.50128307 |
| Mormopterus_phrudus      | 0.0051323  | 0 0.50128307 |
| Myotis_aelleni           | 0.0051323  | 0 0.50128307 |
| Tomopeas_ravus           | 0.0051323  | 0 0.50128307 |
| Lonchophylla_dekeyseri   | 0.00513212 | 0 0.50128303 |
| Lonchophylla_hesperia    | 0.00513212 | 0 0.50128303 |
| Sturnira_nana            | 0.00513212 | 0 0.50128303 |
| Lonchophylla_handleyi    | 0.00513212 | 0 0.50128303 |

|                             |            |              |
|-----------------------------|------------|--------------|
| Emballonura_furax           | 0.00512523 | 0 0.50128131 |
| Emballonura_serii           | 0.00512511 | 0 0.50128127 |
| Melonycteris_fardoulisi     | 0.00512511 | 0 0.50128127 |
| Nyctophilus_nebulosus       | 0.00512511 | 0 0.50128127 |
| Pteropus_temminckii         | 0.00512511 | 0 0.50128127 |
| Taphozous_achates           | 0.00512511 | 0 0.50128127 |
| Chalinolobus_neocaledonicus | 0.00512511 | 0 0.50128127 |
| Glauconycteris_superba      | 0.00512433 | 0 0.50128108 |
| Hesperoptenus_gaskelli      | 0.00512433 | 0 0.50128108 |
| Falsistrellus_petersi       | 0.00512236 | 0 0.50128059 |
| Myotis_gomantongensis       | 0.00512108 | 0 0.50128027 |
| Pipistrellus_papuanus       | 0.00512108 | 0 0.50128027 |
| Pipistrellus_wattsi         | 0.00512108 | 0 0.50128027 |
| Platyrrhinus_chocoensis     | 0.00512108 | 0 0.50128027 |
| Rhogeessa_hussoni           | 0.00512108 | 0 0.50128027 |
| Lonchorhina_inusitata       | 0.00512108 | 0 0.50128027 |
| Pipistrellus_inexpectatus   | 0.00511891 | 0 0.50127973 |
| Molossus_sinaloae           | 0.00511729 | 0 0.50127932 |
| Kerivoula_agnella           | 0.00511116 | 0 0.5012779  |
| Kerivoula_myrella           | 0.00511116 | 0 0.5012779  |
| Micronycteris_sanborni      | 0.00510888 | 0 0.50127722 |
| Thyroptera_lavali           | 0.00510888 | 0 0.50127722 |
| Glauconycteris_curryae      | 0.00510881 | 0 0.5012772  |
| Micronycteris_matses        | 0.00510881 | 0 0.5012772  |
| Emballonura_dianae          | 0.00510758 | 0 0.50127689 |
| Hesperoptenus_doriae        | 0.00510758 | 0 0.50127689 |
| Nyctophilus_microdon        | 0.00510758 | 0 0.50127689 |
| Pharotis_imogene            | 0.00510758 | 0 0.50127689 |
| Glauconycteris_alboguttata  | 0.00510758 | 0 0.50127689 |
| Artibeus_incomitatus        | 0.00509965 | 0 0.50127491 |
| Choeroniscus_periosus       | 0.00509535 | 0 0.50127384 |
| Glauconycteris_egeria       | 0.00509535 | 0 0.50127384 |
| Kerivoula_cuprosa           | 0.00509535 | 0 0.50127384 |
| Neonycteris_pusilla         | 0.00509524 | 0 0.50127381 |
| Glyphonycteris_behnii       | 0.00509518 | 0 0.50127379 |
| Rhinophylla_alethina        | 0.00509518 | 0 0.50127379 |
| Myotis_findleyi             | 0.00508622 | 0 0.50127155 |
| Pteropus_rennelli           | 0.00506068 | 0 0.50126517 |
| Rhinonictus_aurantia        | 0.00505694 | 0 0.50126423 |
| Miniopterus_robustior       | 0.00504735 | 0 0.50126183 |
| Myotis_insularum            | 0.00504735 | 0 0.50126183 |
| Lophostoma_evotis           | 0.00502997 | 0 0.50125749 |

|                          |            |              |
|--------------------------|------------|--------------|
| Amorphochilus_schnablii  | 0.00502845 | 0 0.50125711 |
| Rhinolophus_rouxii       | 0.00499813 | 0 0.50124953 |
| Pteropus_capistratus     | 0.00492376 | 0 0.50123094 |
| Aproteles_bulmerae       | 0.00492118 | 0 0.50123029 |
| Vespadelus_vulturnus     | 0.00491543 | 0 0.50122886 |
| Triaenops_rufus          | 0.00487991 | 0 0.50121998 |
| Vespadelus_regulus       | 0.0048666  | 0 0.50121665 |
| Lasiurus_intermedius     | 0.00486637 | 0 0.50121659 |
| Epomophorus_crypturus    | 0.00484558 | 0 0.50121139 |
| Pteropus_admiralatum     | 0.00483223 | 0 0.50120806 |
| Myzopoda_aurita          | 0.00482564 | 0 0.50120641 |
| Nyctophilus_timoriensis  | 0.00482289 | 0 0.50120572 |
| Notopteris_neocaledonica | 0.00474365 | 0 0.50118591 |
| Myotis_sodalis           | 0.00473159 | 0 0.5011829  |
| Hipposideros_turpis      | 0.00472571 | 0 0.50118143 |
| Neoromicia_capensis      | 0.00462729 | 0 0.50115682 |
| Balantiopteryx_io        | 0.00442882 | 0 0.5011072  |
| Mormopterus_planiceps    | 0.00441811 | 0 0.50110453 |
| Vespadelus_pumilus       | 0.00438333 | 0 0.50109583 |
| Dobsonia_beauforti       | 0.00435885 | 0 0.50108971 |
| Vampyressa_thyone        | 0.00431884 | 0 0.50107971 |
| Hylonycteris_underwoodi  | 0.00414261 | 0 0.50103565 |
| Scotonycteris_ophiodon   | 0.00404804 | 0 0.50101201 |
| Casinycteris_argynnis    | 0.00400937 | 0 0.50100234 |
| Idionycteris_phyllotis   | 0.00397627 | 0 0.50099407 |
