# Supplementary material for: Undiscovered Bat Hosts of Filoviruses
Source: PubMed Central journal article supplement (PMC4945033; doi:10.1371/journal.pntd.0004815), 2016-07-14
Supplement: pntd.0004815.s005.pdf [file pntd.0004815.s005.pdf]

| <b>%data cells<br/>dropped</b> | <b>S statistic</b> | <b>Rho</b> | <b>p-value</b> |
|--------------------------------|--------------------|------------|----------------|
| 1                              | 3045800            | 0.9868521  | < 2.2e-16      |
| 5                              | 2475800            | 0.9893126  | < 2.2e-16      |
| 10                             | 7437700            | 0.967893   | < 2.2e-16      |
| 15                             | 7329400            | 0.9683606  | < 2.2e-16      |
| 20                             | 22637000           | 0.9022795  | < 2.2e-16      |
