# Supplementary material for: Undiscovered Bat Hosts of Filoviruses
Source: PubMed Central journal article supplement (PMC4945033; doi:10.1371/journal.pntd.0004815), 2016-07-14
Supplement: pntd.0004815.s006.pdf [file pntd.0004815.s006.pdf]

|                             |               |
|-----------------------------|---------------|
| <b>Response</b>             | Label         |
| <b>Error distribution</b>   | Bernoulli     |
| <b>Train/test fraction</b>  | 80/20         |
| <b>Shrinkage</b>            | 0.001         |
| <b>Interaction depth</b>    | 3             |
| <b>Best.iter</b>            | 2356/5000     |
| <b>CV folds</b>             | 10            |
| <b>Performance (train)</b>  | 0.995         |
| <b>Performance (test)</b>   | 0.974         |
| <b>Mean(permutedAUC500)</b> | 0.6 (sd=0.08) |
| <b>Corrected test AUC</b>   | <b>0.874</b>  |

| <b>Variable</b>                 | <b>Relative Importance</b> |
|---------------------------------|----------------------------|
| spp.dens.per.km                 | 13.11331244                |
| X23.1_SexualMaturityAge_d       | 11.84181085                |
| X5.3_NeonateBodyMass_g          | 9.59740908                 |
| X10.1_PopulationGrpSize         | 8.826269923                |
| X5.4_WeaningBodyMass_g          | 8.134868537                |
| Log10.mass_specific_production. | 7.684370389                |
| X27.2_HuPopDen_Mean_n.km2       | 4.401490125                |
| X26.1_GR_Area_km2               | 4.035338776                |
| X27.4_HuPopDen_Change           | 3.268129917                |
| X26.5_GR_MaxLong_dd             | 2.613752557                |
| WOS_HITS                        | 2.537961838                |
| X9.1_GestationLen_d             | 1.941994599                |
| X3.1_AgeatFirstBirth_d          | 1.918571991                |
| X16.1_LittersPerYear            | 1.701514746                |
| X15.1_LitterSize                | 1.577198076                |
| X5.1_AdultBodyMass_g            | 1.370461379                |
| X26.3_GR_MinLat_dd              | 1.265506038                |
| X26.2_GR_MaxLat_dd              | 1.232562947                |
| X25.1_WeaningAge_d              | 1.092707981                |
| X28.1_Precip_Mean_mm            | 1.082682164                |
| X8.1_AdultForearmLen_mm         | 1.027033826                |
| X26.4_GR_MidRangeLat_dd         | 0.956366489                |
| X26.6_GR_MinLong_dd             | 0.947111109                |
| aridity                         | 0.841975573                |
| X28.2_Temp_Mean_01degC          | 0.767619668                |
| X30.2_PET_Mean_mm               | 0.611492891                |
| X27.3_HuPopDen_5p_n.km2         | 0.551542133                |
| BodySizeRatio                   | 0.517049908                |
| X13.1_AdultHeadBodyLen_mm       | 0.503954943                |
| postnatGR                       | 0.414734305                |
| X6.2_TrophicLevel               | 0.412999422                |
| X30.1_AET_Mean_mm               | 0.39804641                 |
| X26.7_GR_MidRangeLong_dd        | 0.355652208                |
| Diet.Fruit                      | 0.283731119                |
| RelAgeSexMat                    | 0.273870251                |
| X13.2_NeonateHeadBodyLen_mm     | 0.265575067                |
| X27.1_HuPopDen_Min_n.km2        | 0.252911806                |
| Rhinolophidae                   | 0.185631509                |
| X6.1_DietBreadth                | 0.180218346                |
| BodyMass.Value                  | 0.177057682                |
| Pteropodidae                    | 0.14543347                 |
| X10.2_SocialGrpSize             | 0.118735711                |
| X17.1_MaxLongevity_m            | 0.11464902                 |
| X2.1_AgeatEyeOpening_d          | 0.073629401                |
| X18.1_BasalMetRate_mLO2hr       | 0.071359519                |
| Vespertilionidae                | 0.06771355                 |
| migration status                | 0.058279096                |
| Diet.Inv                        | 0.048245038                |
| ForStrat.Value                  | 0.046545423                |
| X5.5_AdultBodyMass_g_EXT        | 0.038010393                |
| torpor                          | 0.033928007                |
| Molossidae                      | 0.012454492                |
| Hipposideridae                  | 0.005112458                |
| IUCN                            | 0.003415404                |
| X1.1_ActivityCycle              | 0                          |
| X5.2_BasalMetRateMass_g         | 0                          |
| Phyllostomidae                  | 0                          |
